# Supplementary material
Source: PubMed Central journal article supplement (PMC2924451)

## Supporting Information

### Non-Peptide Macrocyclic Histone Deacetylase Inhibitors Derived from Tricyclic Ketolide Skeleton

Sandra C. Mwakwari, William Guerrant, Vishal Patil, Shabana I. Khan, Babu L. Tekwani, Zachary A. Gurard-Levin, Milan Mrksich, and Adegboyega K. Oyelere

*School of Chemistry and Biochemistry, School of Biology, and Parker H. Petit Institute for Bioengineering and Bioscience, Georgia Institute of Technology, Atlanta, GA 30332-0400 USA*

### Contents

|                                                                                                                                                         | Pages            |
|---------------------------------------------------------------------------------------------------------------------------------------------------------|------------------|
| 1. Experimental for <b>10</b> and <b>11</b>                                                                                                             | <b>S2</b>        |
| 2. <sup>1</sup> H and <sup>13</sup> C NMR spectra of tricyclic ketolide HDACi compounds and their intermediates <b>6, 7, 8, 9, 10, 11, 14a-e, 15a-e</b> | <b>S3 – S18</b>  |
| 3. HPLC traces of <b>15a-e</b>                                                                                                                          | <b>S19 – S21</b> |
| 4. Molecular modeling structures                                                                                                                        | <b>S22</b>       |
| 5. Schematic of the SAMDI Assay                                                                                                                         | <b>S23</b>       |
| 6. Pf-HDAC1 Activity Dose-response Curves of <b>15a-e</b>                                                                                               | <b>S24 – S26</b> |

## Experimentals:

### Tricyclic Ketolide TE-802 (10)

Synthesis of TE-802 is according to protocol in ref.25. Purification by silica gel column chromatography (12:1:0.1 CH<sub>2</sub>Cl<sub>2</sub>/MeOH/concentrated NH<sub>4</sub>OH) afforded 62% of compound **10**. <sup>1</sup>H NMR (CDCl<sub>3</sub>, 400 MHz) δ 0.86 (3H, t, *J* = 7.2 Hz), 1.04 (3H, d, *J* = 6.8 Hz), 1.10-1.41 (12H, m), 1.49 (6H, s), 1.53-2.00 (8H, m), 2.26 (6H, s), 2.40-2.49 (2H, m), 2.72 (3H, s), 2.84-3.25 (3H, m), 3.48-3.85 (4H, m), 3.99-4.02 (1H, m), 4.20 (1H, d, *J* = 8.4 Hz), 4.29 (1H, d, *J* = 7.6 Hz), 4.95 (1H, d, *J* = 10.0 Hz); <sup>13</sup>C NMR (CDCl<sub>3</sub>, 100 MHz) 10.4, 10.8, 12.8, 14.4, 16.4, 19.1, 19.6, 21.1, 22.0, 28.2, 36.3, 38.5, 40.2, 42.3, 42.7, 48.1, 49.1, 49.5, 51.2, 53.4, 59.9, 65.8, 69.5, 70.3, 76.4, 78.5, 79.1, 81.5, 103.8, 156.0, 169.5, 181.3, 204.2; HRMS (ESI) calc for [C<sub>33</sub>H<sub>55</sub> N<sub>3</sub> O<sub>9</sub> + H]<sup>+</sup> 638.3973, found 638.4011

### 4-Desmethyltricyclic Ketolide (11)

To a solution of **tricyclic ketolide 10** (3.10 g, 4.88 mmol) in 60 ml of acetone, was added diethyl azodicarboxylate (0.94 g, 5.37 mmol) dropwise. The reaction was stirred at room temperature for 24 h and evaporated to dryness. The yellow residue was diluted in 10 ml of MeOH and 10 ml of saturated NH<sub>4</sub>Cl and refluxed for 1 h. After evaporation to dryness, the yellow residue was taken up with 40 ml of water and the pH was adjusted to 8 with aqueous ammonium hydroxide. Extraction with ethyl acetate (3 x 100 ml), drying over Na<sub>2</sub>SO<sub>4</sub>, and evaporation of the solvent afforded the crude product which was purified on silica column chromatography (80:10:3 ethyl acetate/MeOH/Et<sub>3</sub>N) to give 1.86 g (62 %) of **11** as a creamish foam. <sup>1</sup>H NMR (CDCl<sub>3</sub>, 400 MHz) δ 0.86 (3H, t, *J* = 7.2 Hz), 1.05 (3H, d, *J* = 6.8 Hz), 1.10-1.45 (12H, m), 1.49 (6H, s), 1.53-2.02 (8H, m), 2.43 (3H, s), 2.47-2.54 (2H, m), 2.73 (3H, s), 2.91-3.15 (3H, m), 3.57-3.84 (4H, m), 3.97-4.01 (1H, m), 4.23 (1H, d, *J* = 8.0 Hz), 4.29 (1H, d, *J* = 7.6 Hz), 4.94 (1H, d, *J* = 8.0 Hz); <sup>13</sup>C NMR (CDCl<sub>3</sub>, 100 MHz) 10.4, 10.8, 12.8, 14.4, 16.3, 19.1, 19.5, 20.9, 22.0, 32.8, 36.3, 37.0, 38.5, 42.3, 42.6, 47.8, 49.0, 49.4, 51.1, 59.8, 60.3, 60.6, 69.1, 73.8, 76.5, 78.5, 81.5, 103.0, 156.0, 169.5, 181.1, 204.0; HRMS (ESI) calc for [C<sub>32</sub>H<sub>53</sub> N<sub>3</sub> O<sub>9</sub> + H]<sup>+</sup> 624.3796, found 624.3854

$^1\text{H}$  NMR of **6**

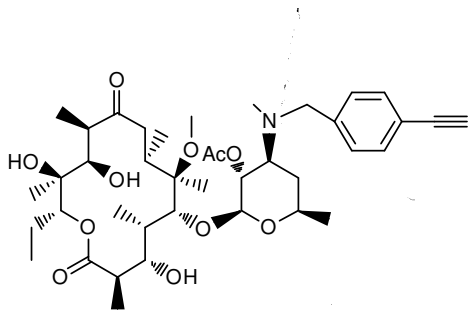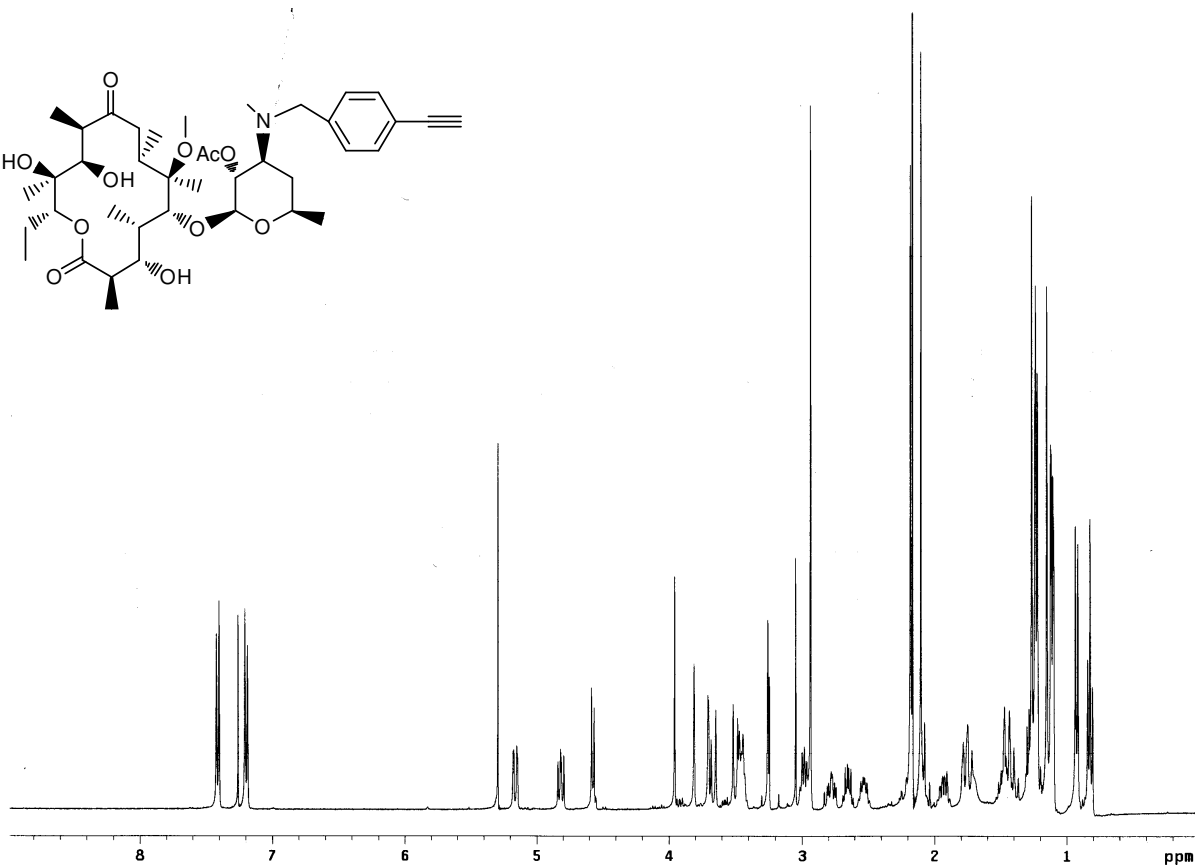

$^{13}\text{C}$  NMR of **6**

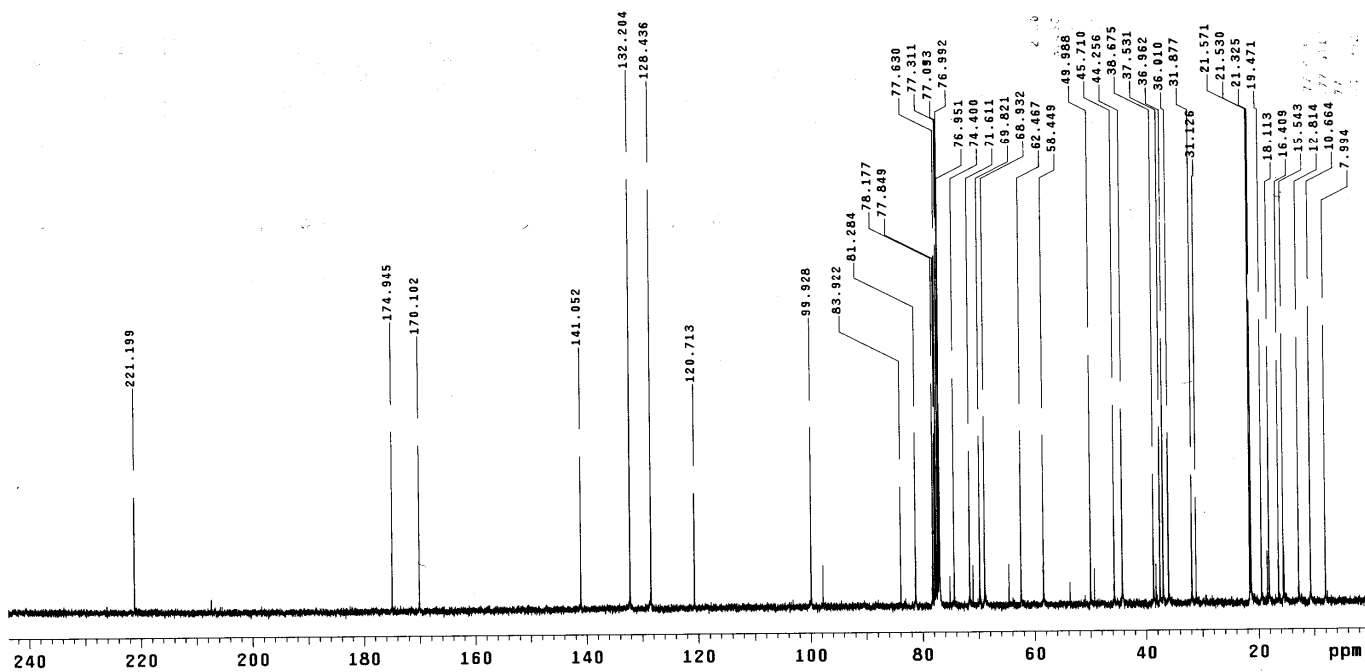

<sup>1</sup>H NMR of 7

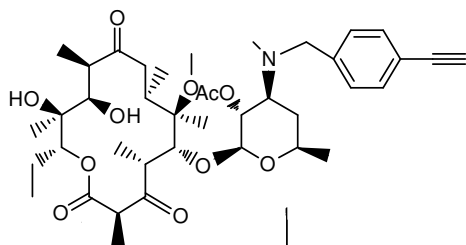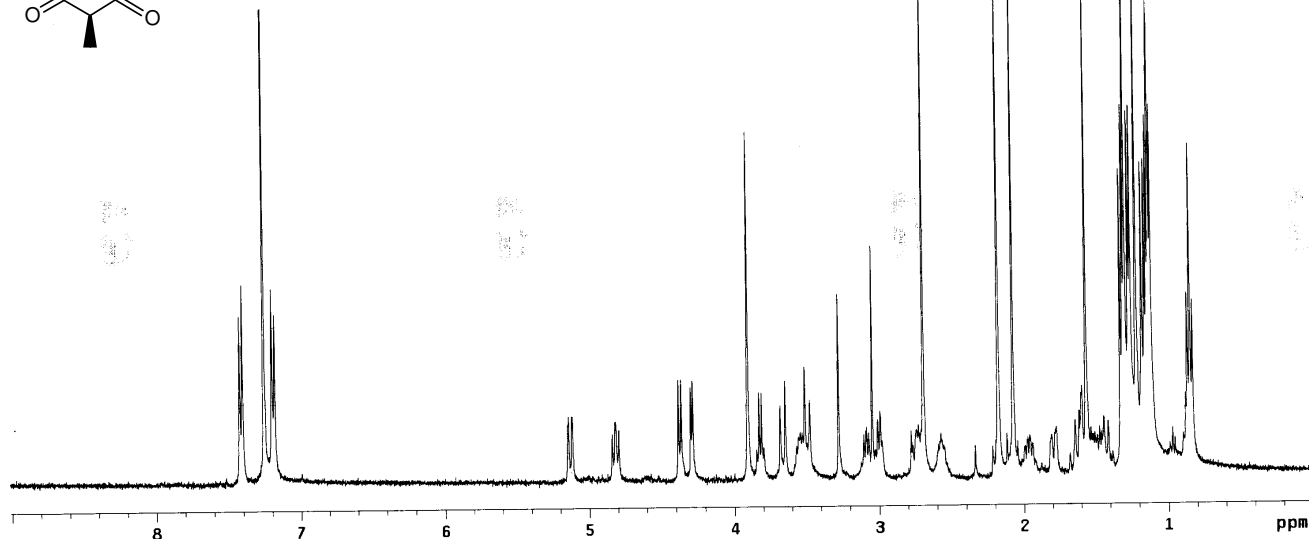

<sup>13</sup>C NMR of 7

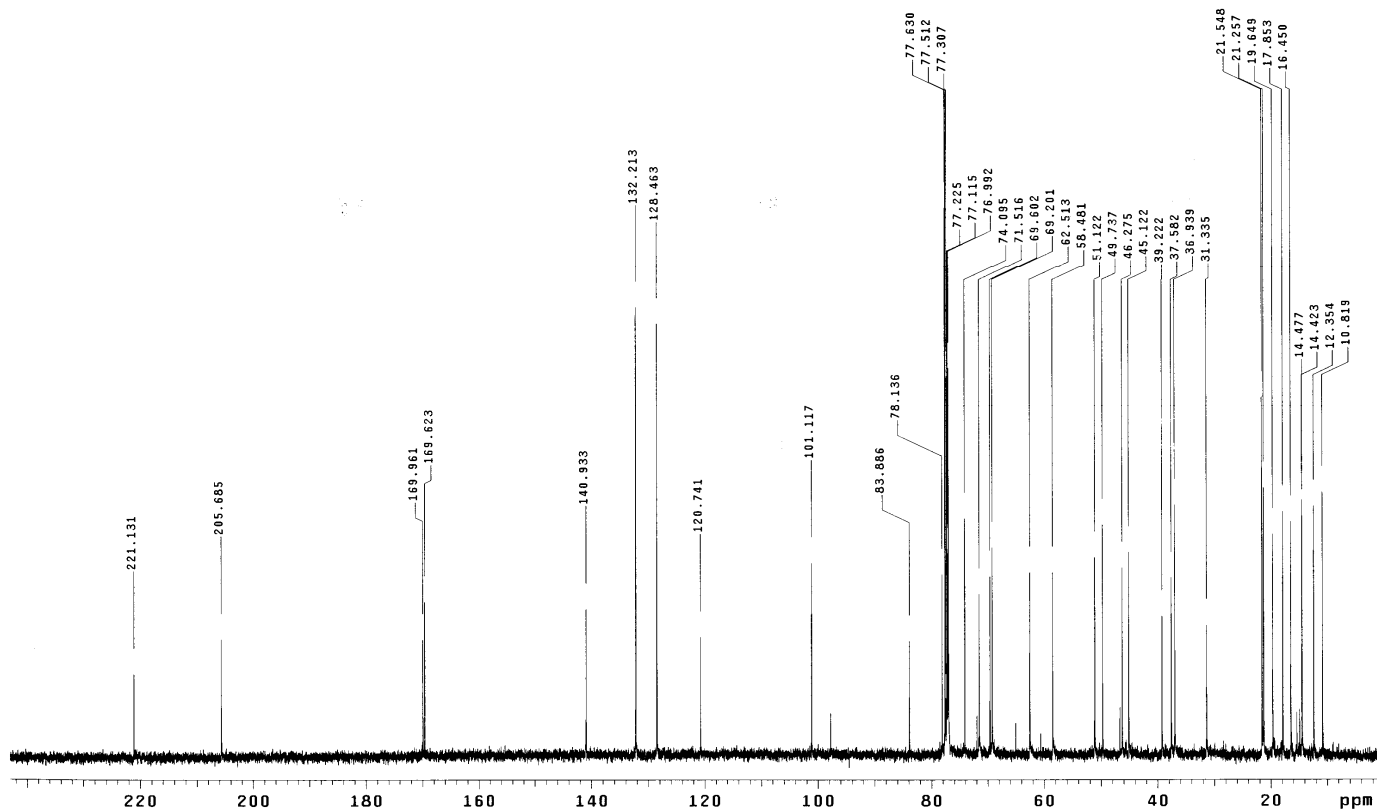

$^1\text{H}$  NMR of **8**

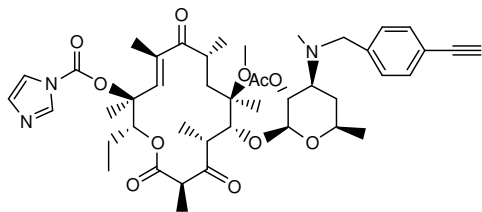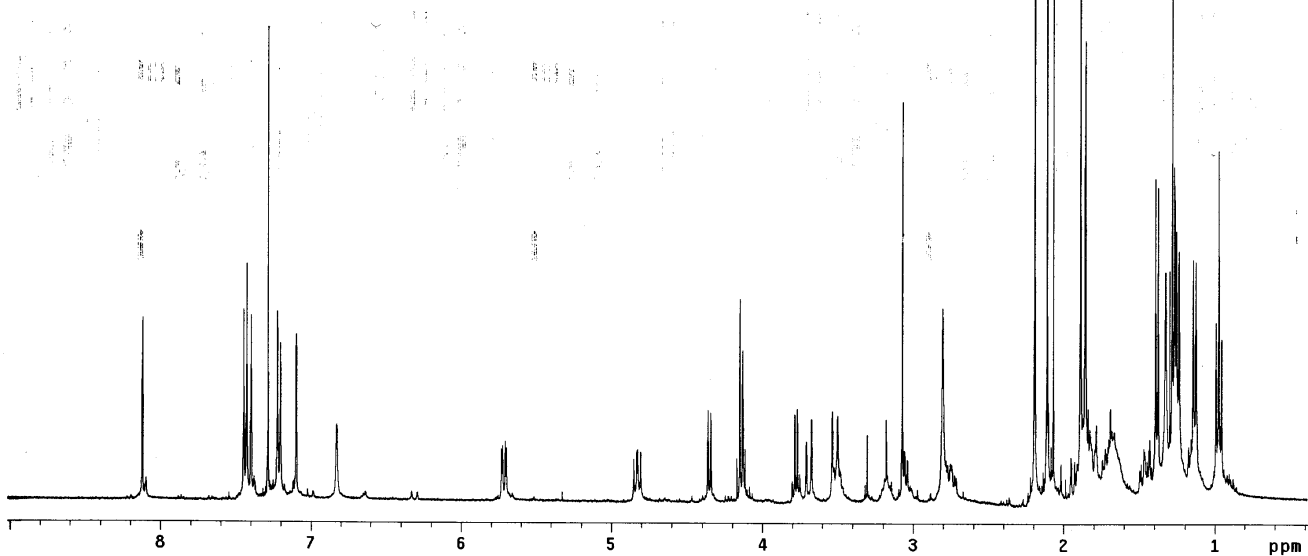

$^{13}\text{C}$  NMR of **8**

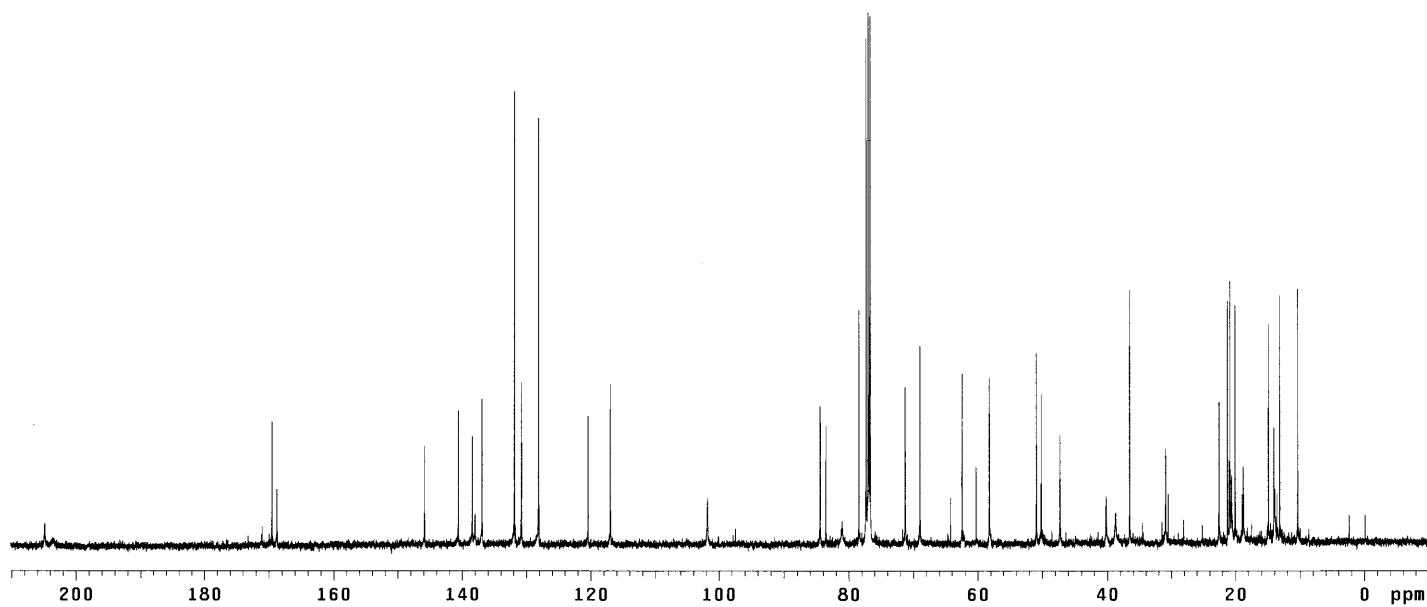

$^1\text{H}$  NMR of **9**

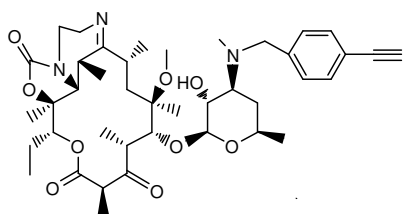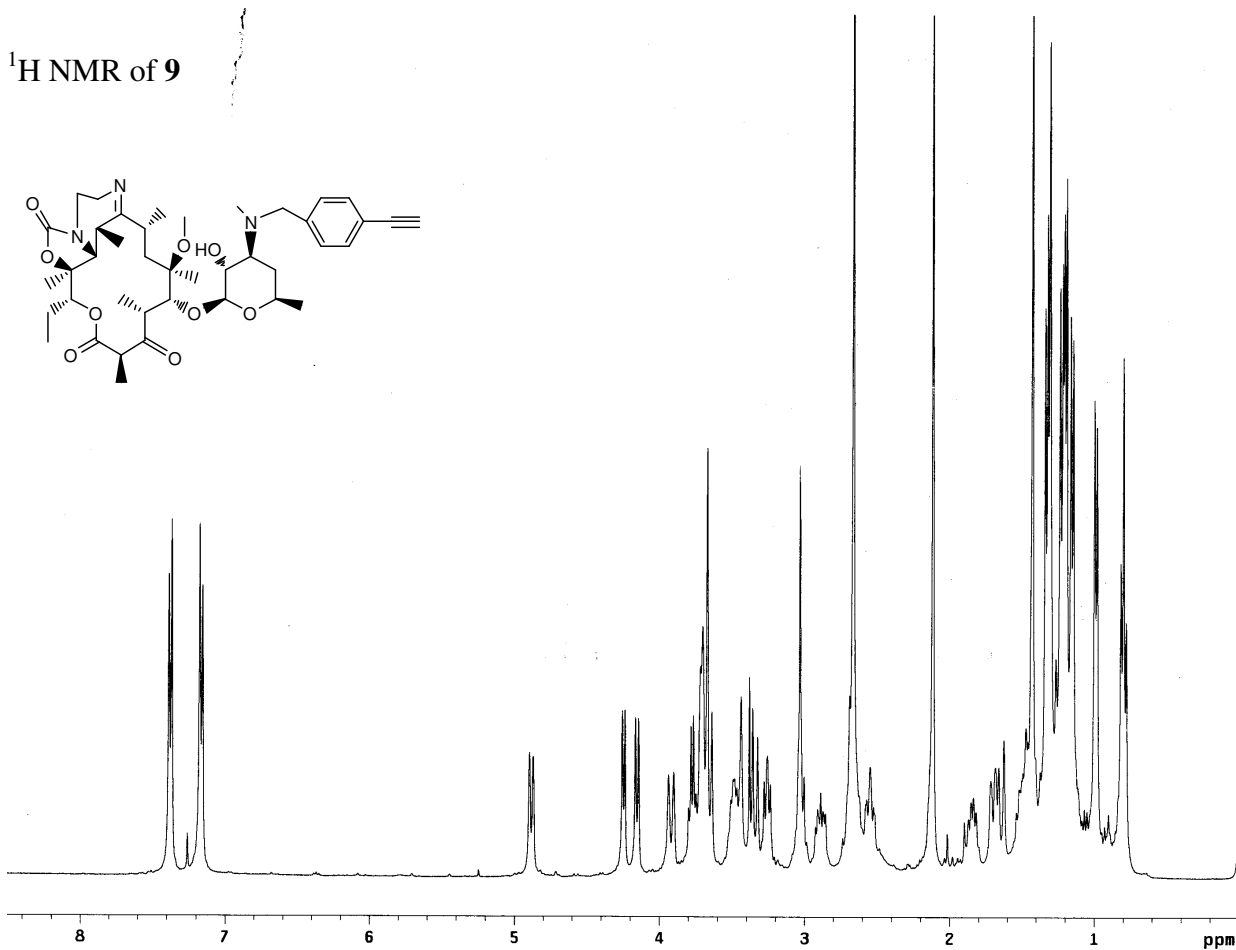

$^{13}\text{C}$  NMR of **9**

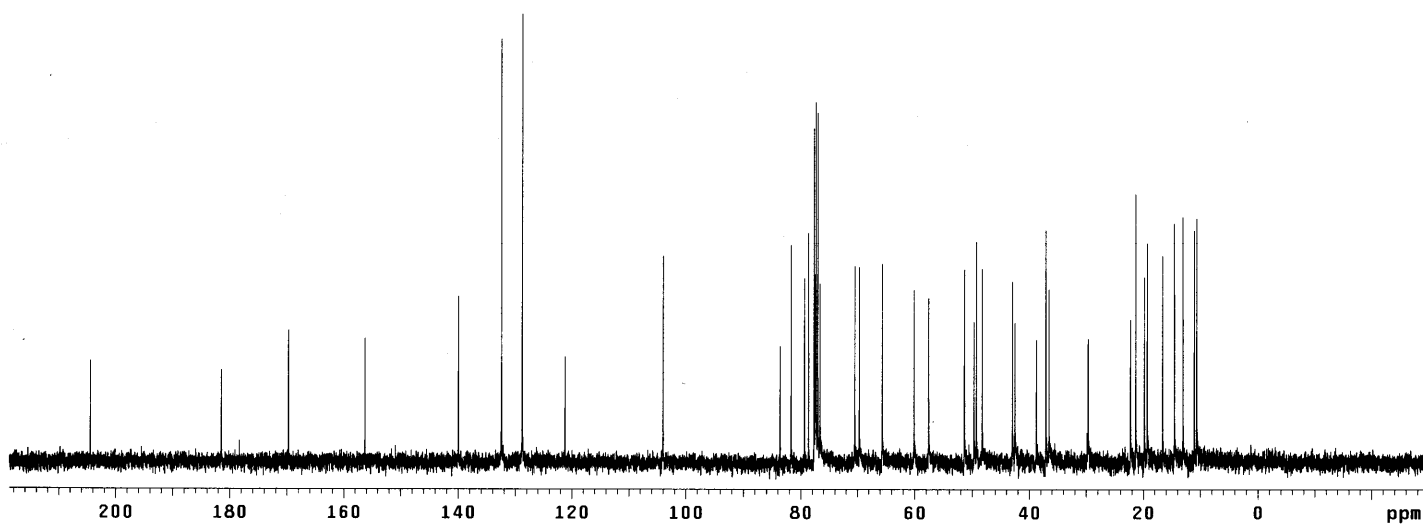

<sup>1</sup>H NMR of **10**

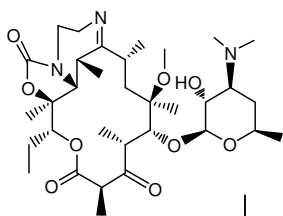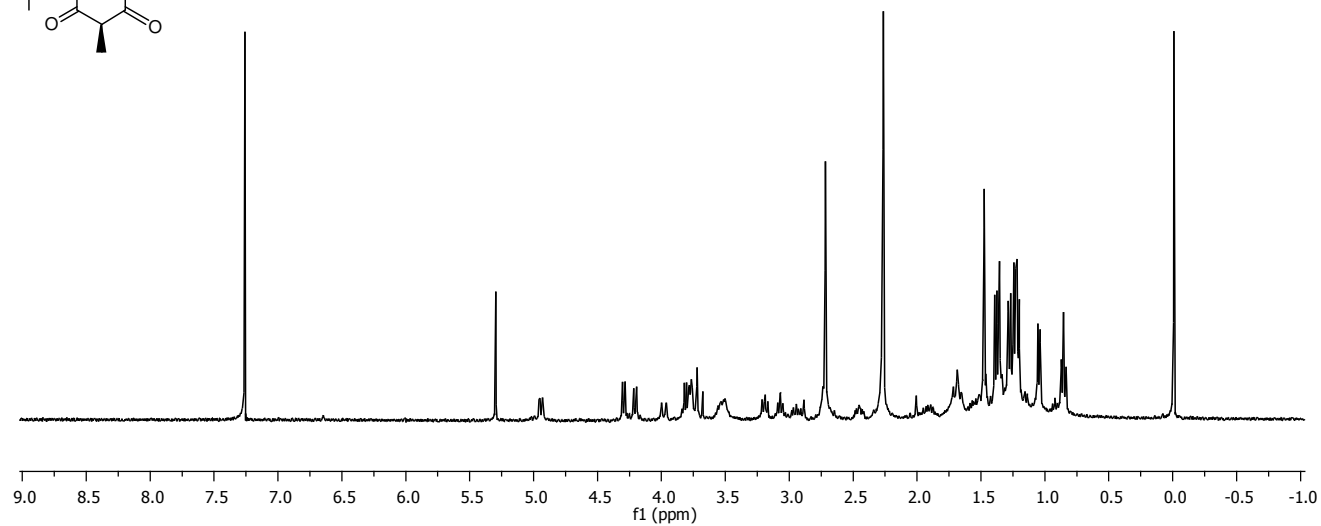

<sup>13</sup>C NMR of **10**

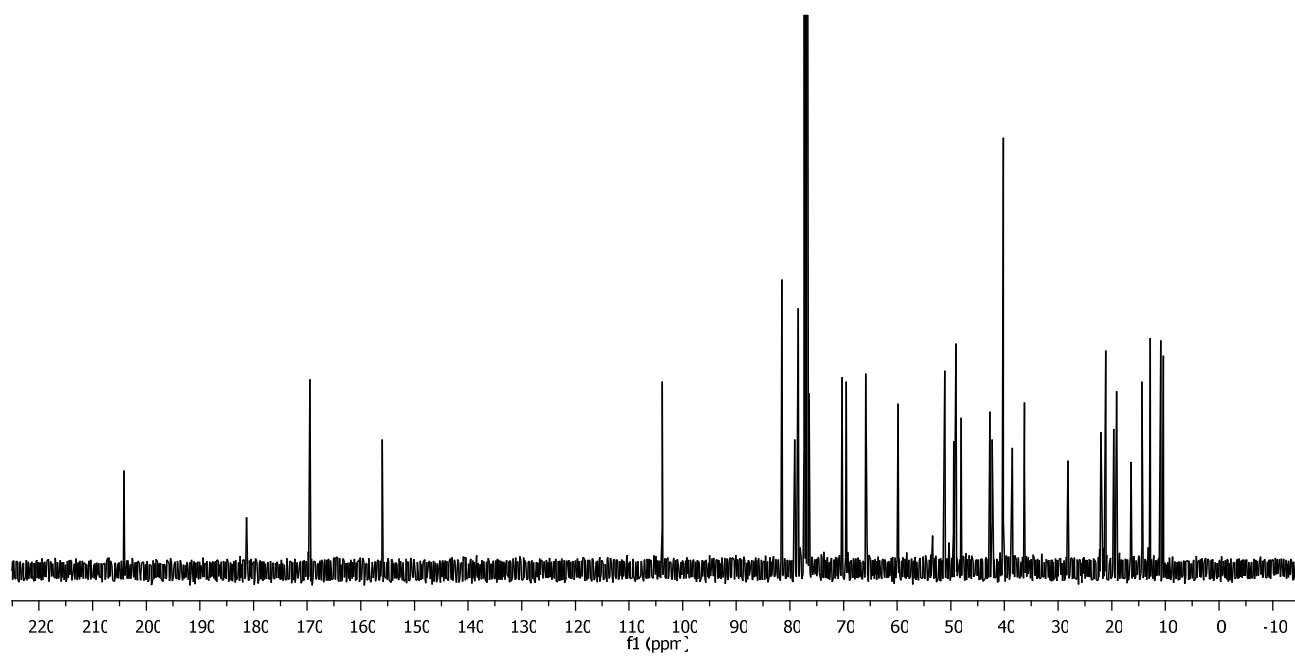

$^1\text{H}$  NMR of **11**

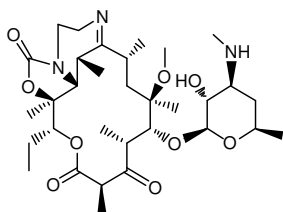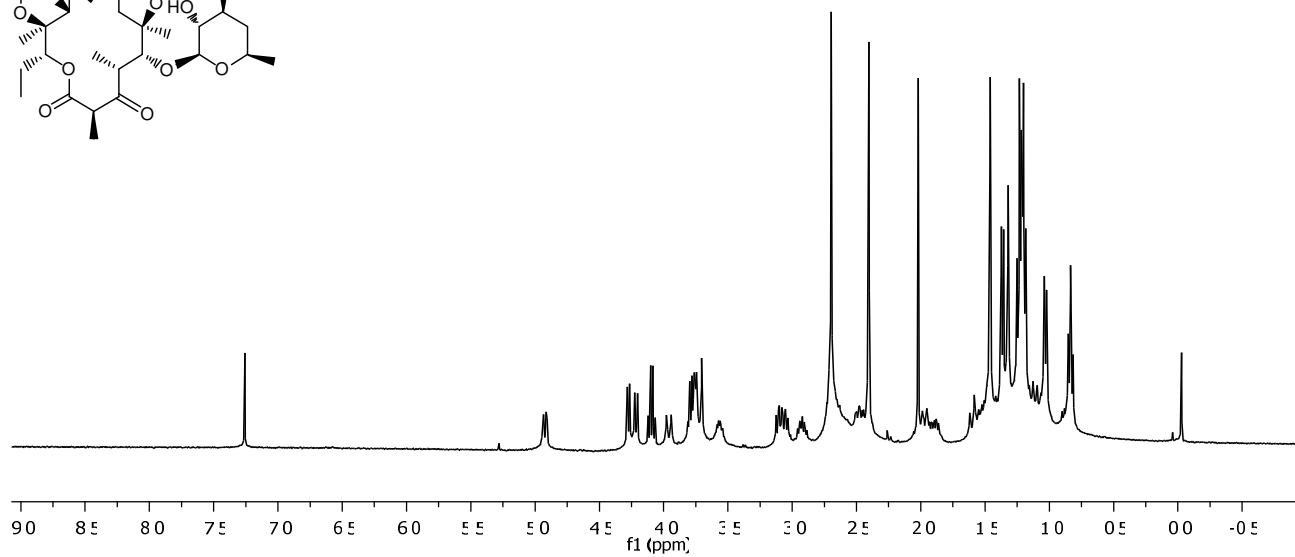

$^{13}\text{C}$  NMR of **11**

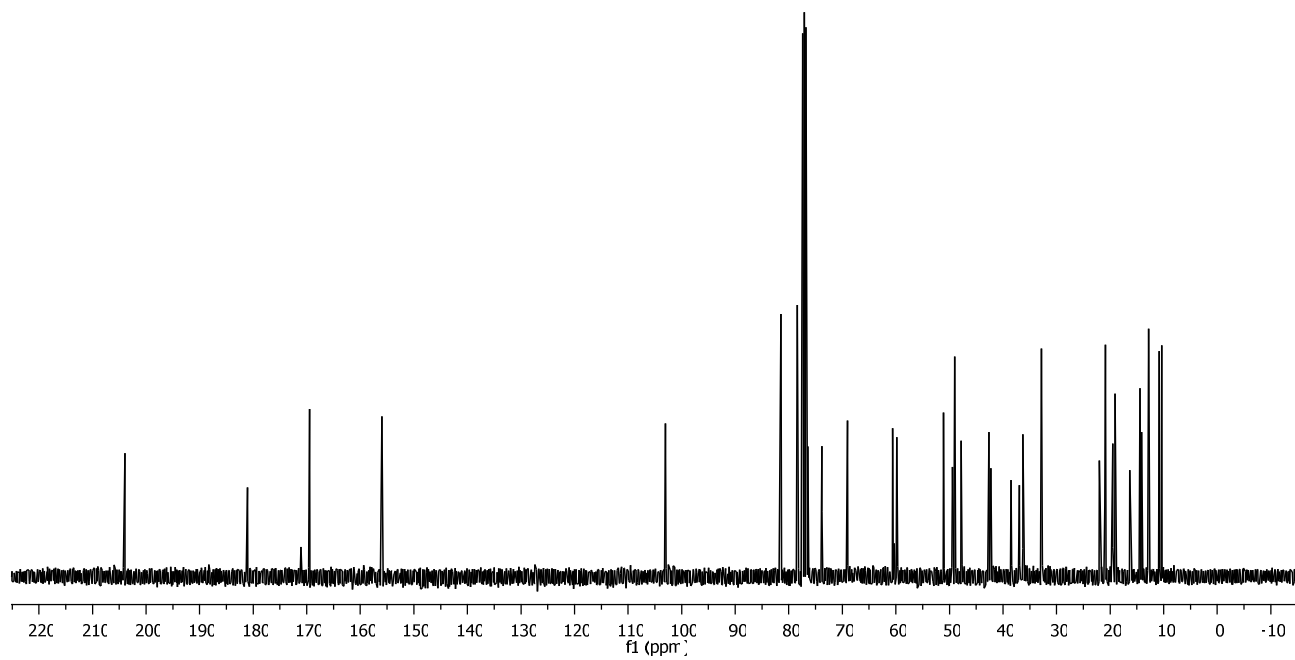



<sup>1</sup>H NMR of **14a**

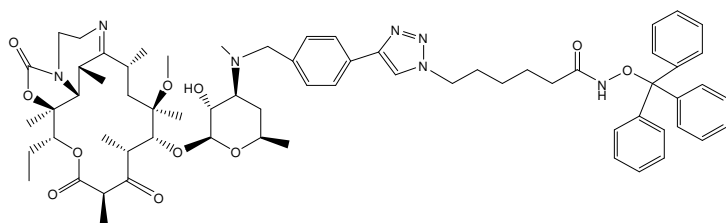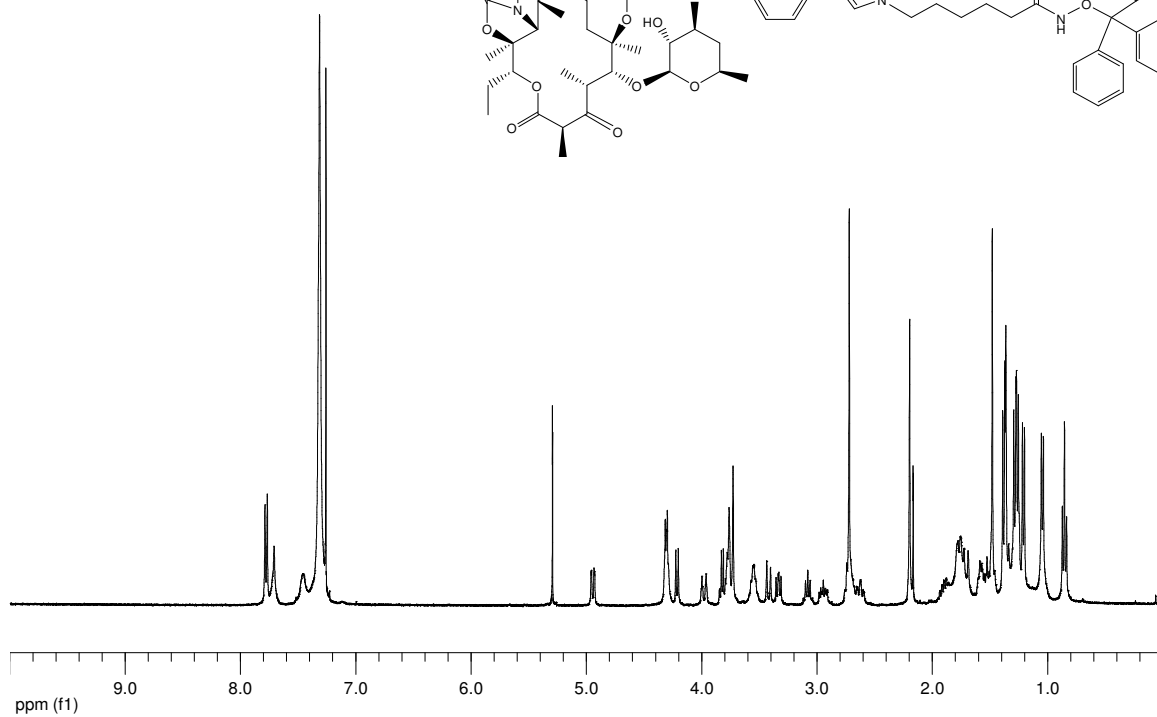

<sup>13</sup>C NMR of **14a**

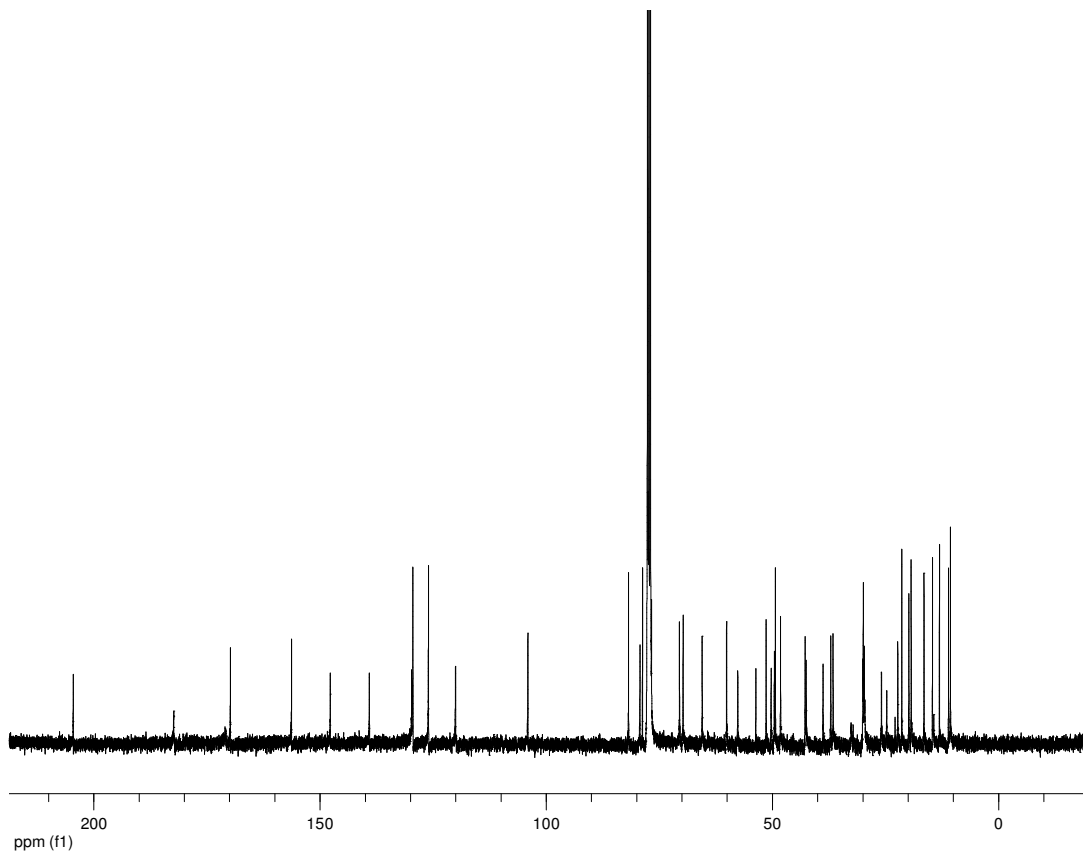

<sup>1</sup>H NMR of **14b**

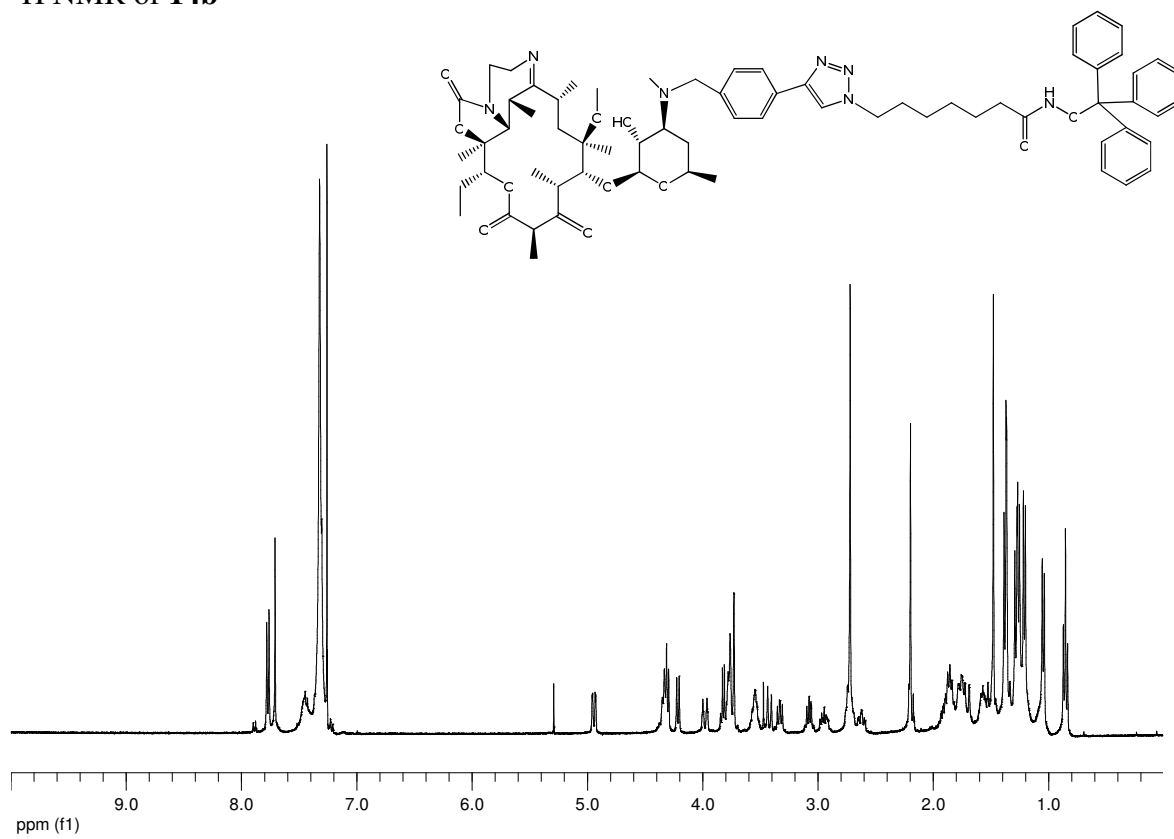

<sup>13</sup>C NMR of **14b**

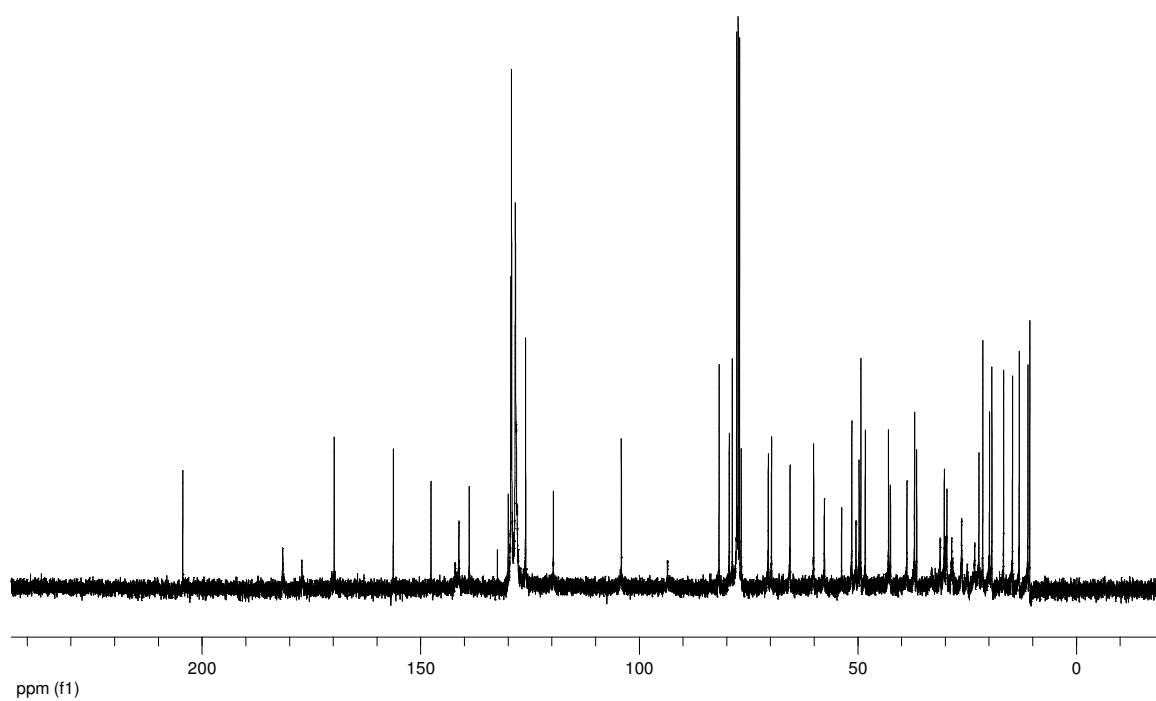

<sup>1</sup>H NMR of **14c**

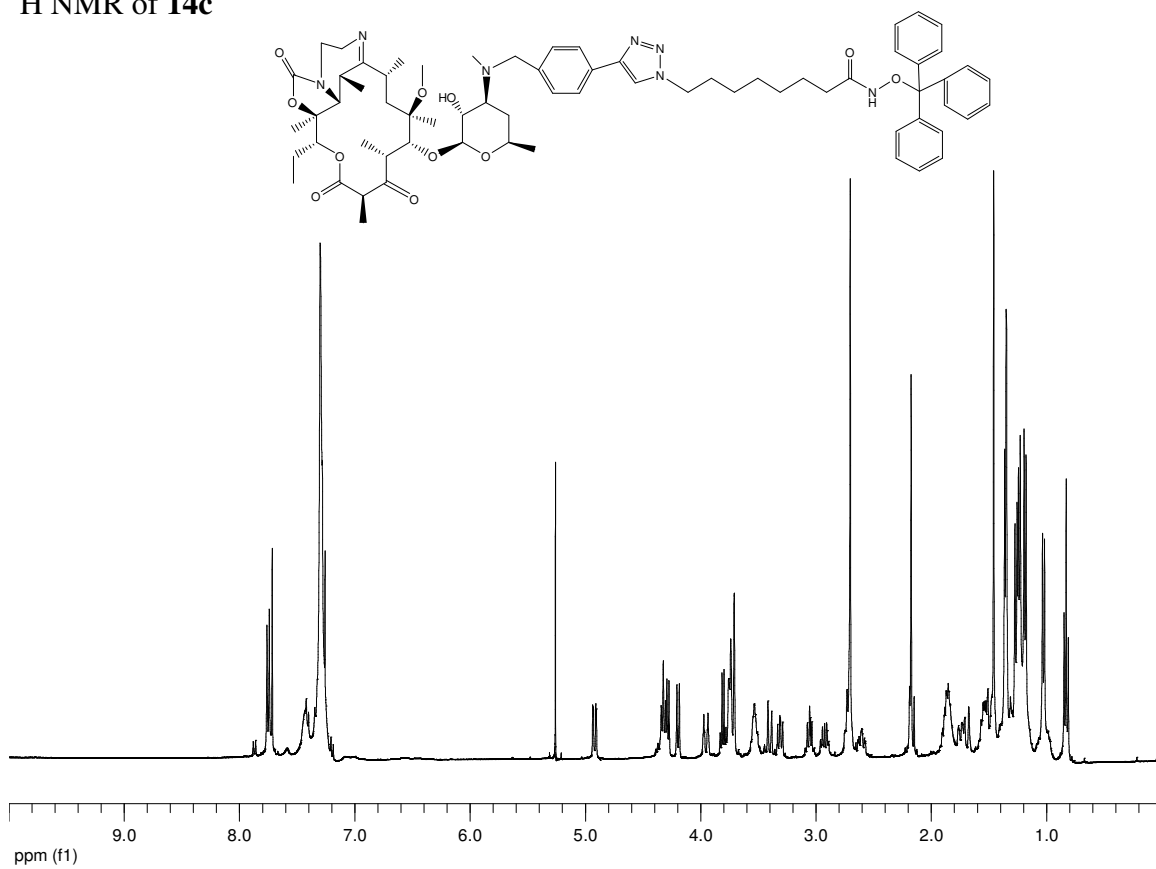

<sup>13</sup>C NMR of **14c**

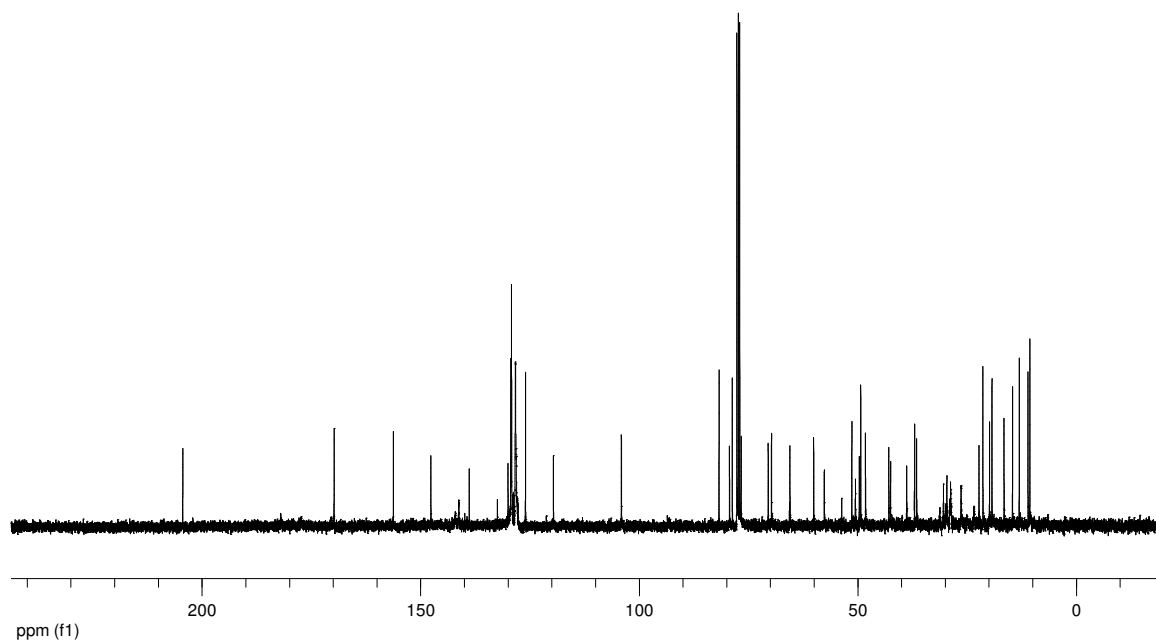

<sup>1</sup>H NMR of **14d**

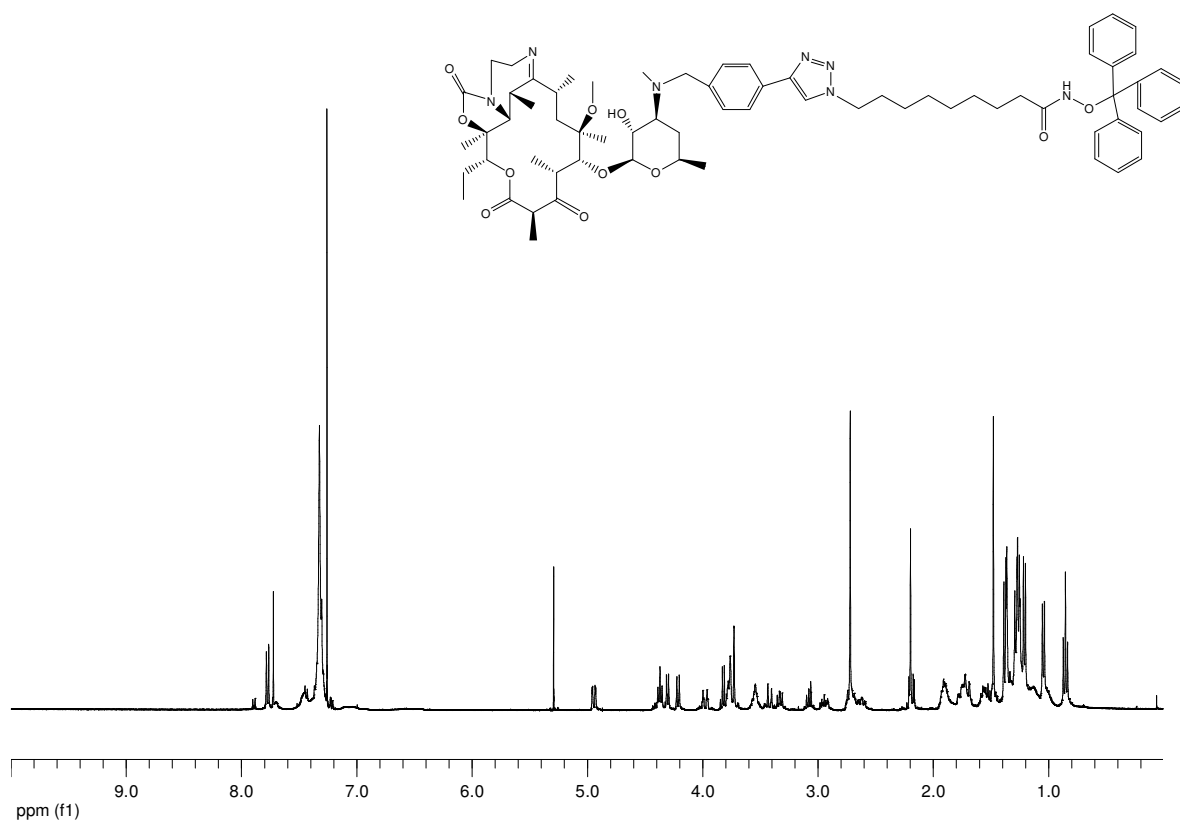

<sup>13</sup>C NMR of **14d**

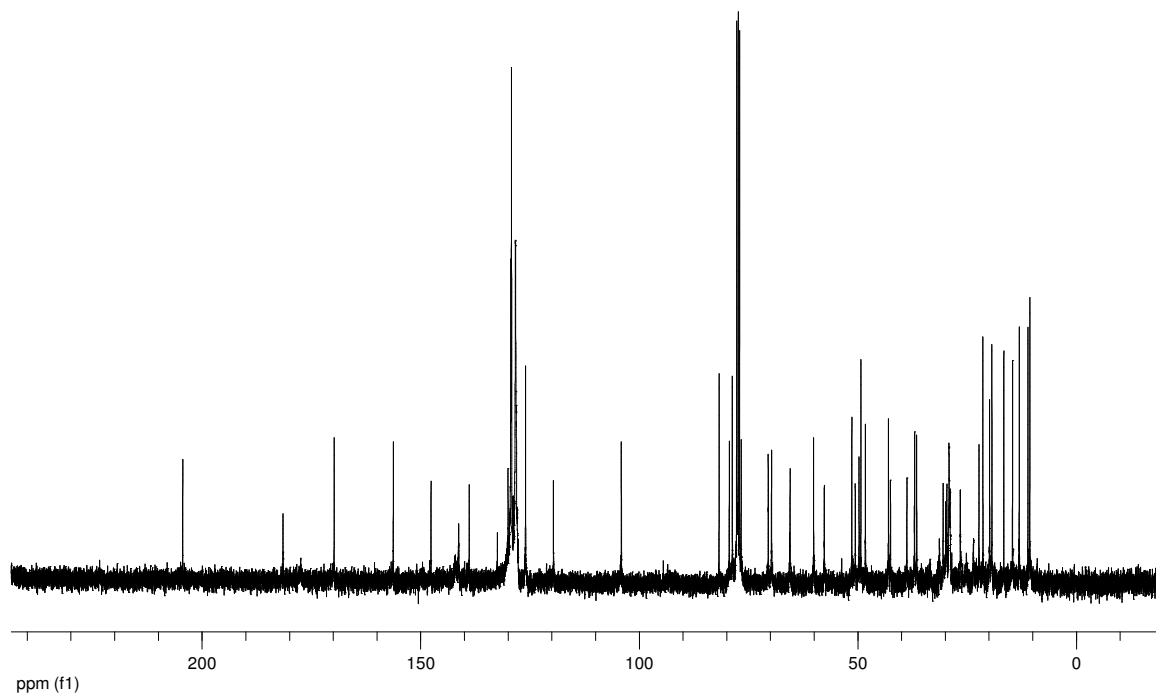

$^1\text{H}$  NMR of **14e**

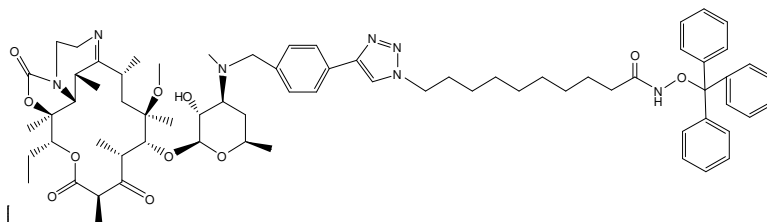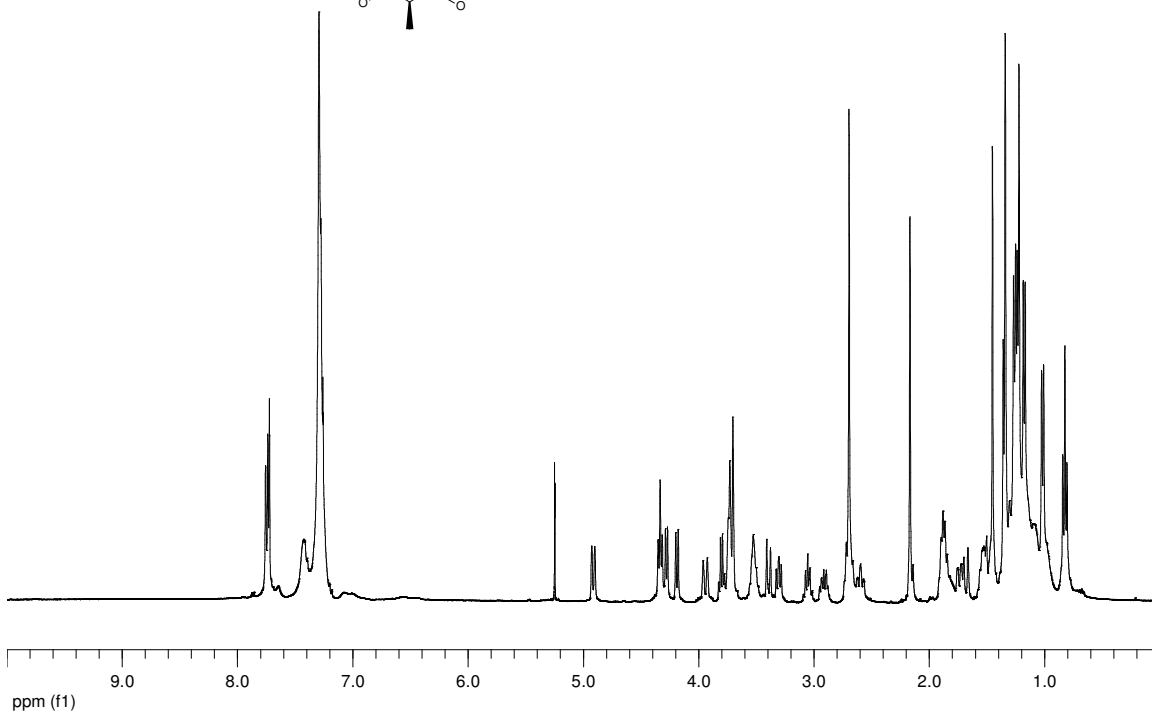

$^{13}\text{C}$  NMR of **14e**

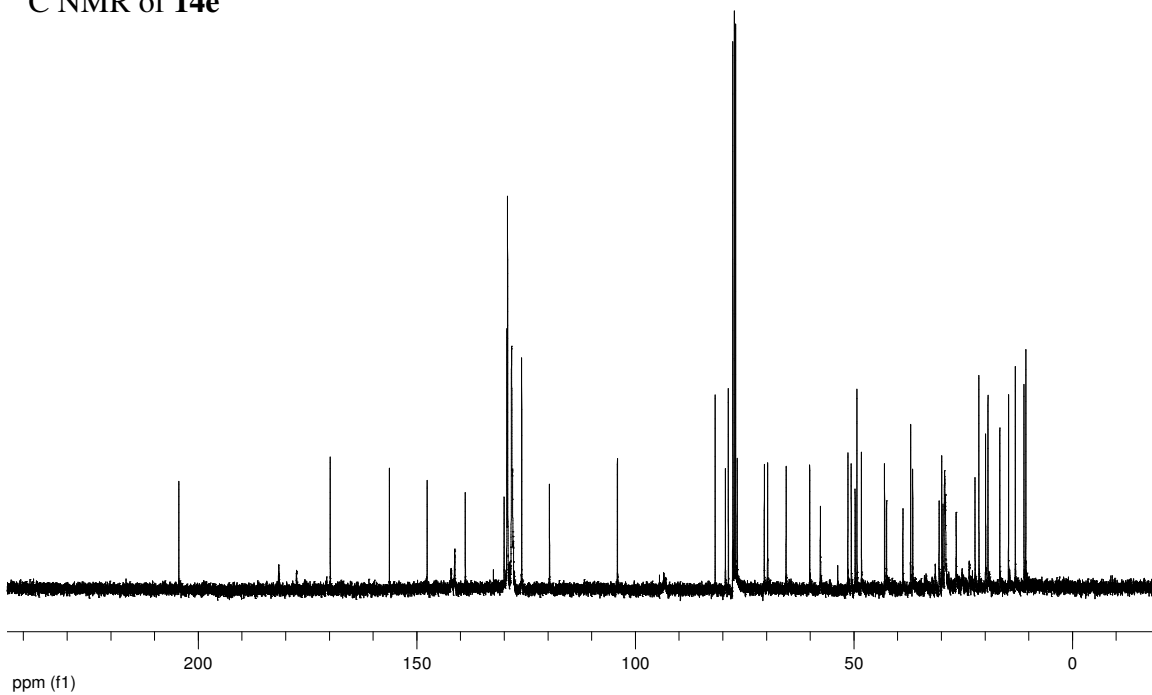

<sup>1</sup>H NMR of **15a**

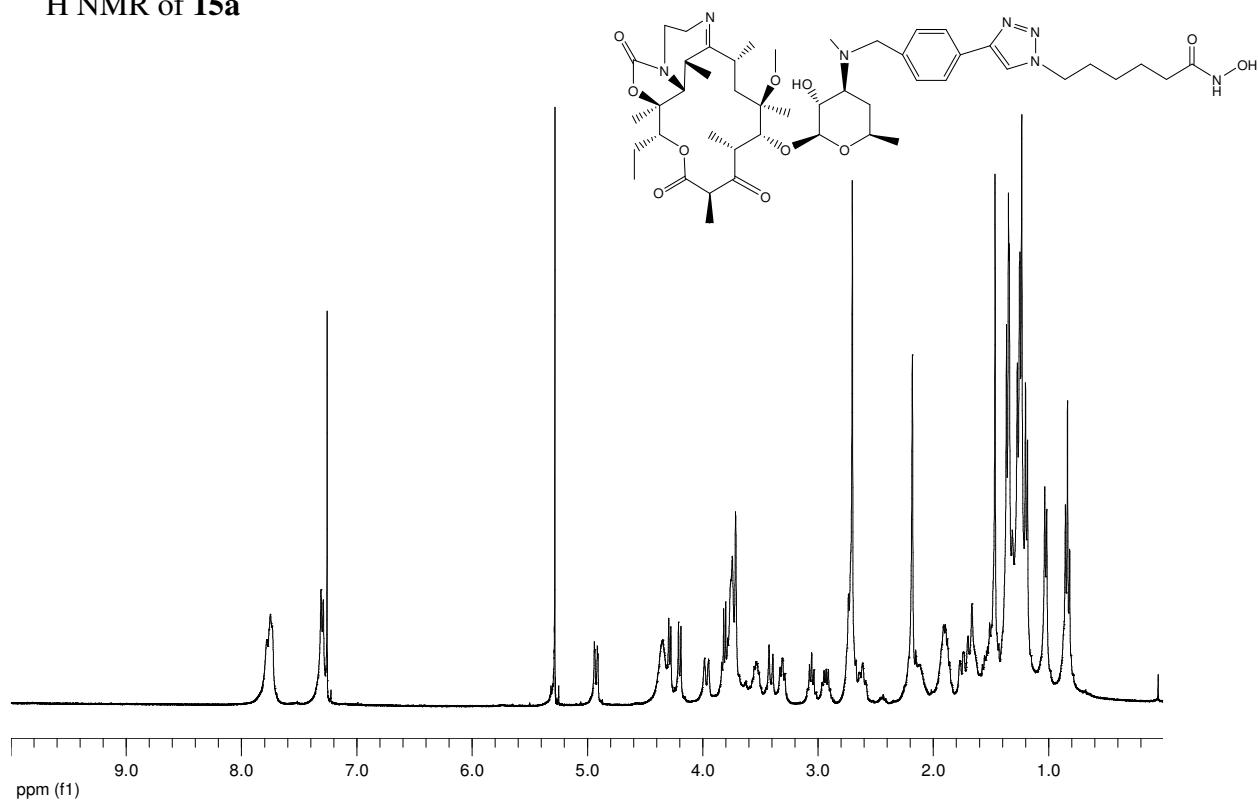

<sup>13</sup>C of **15a**

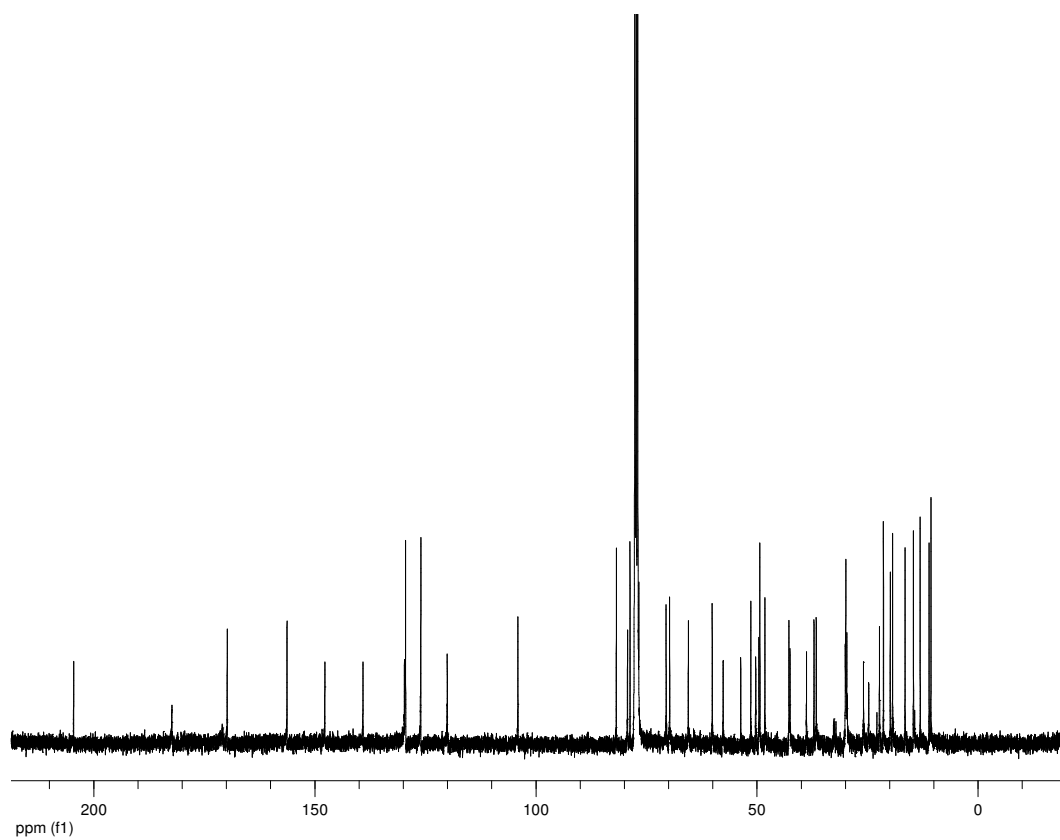

<sup>1</sup>H NMR of **15b**

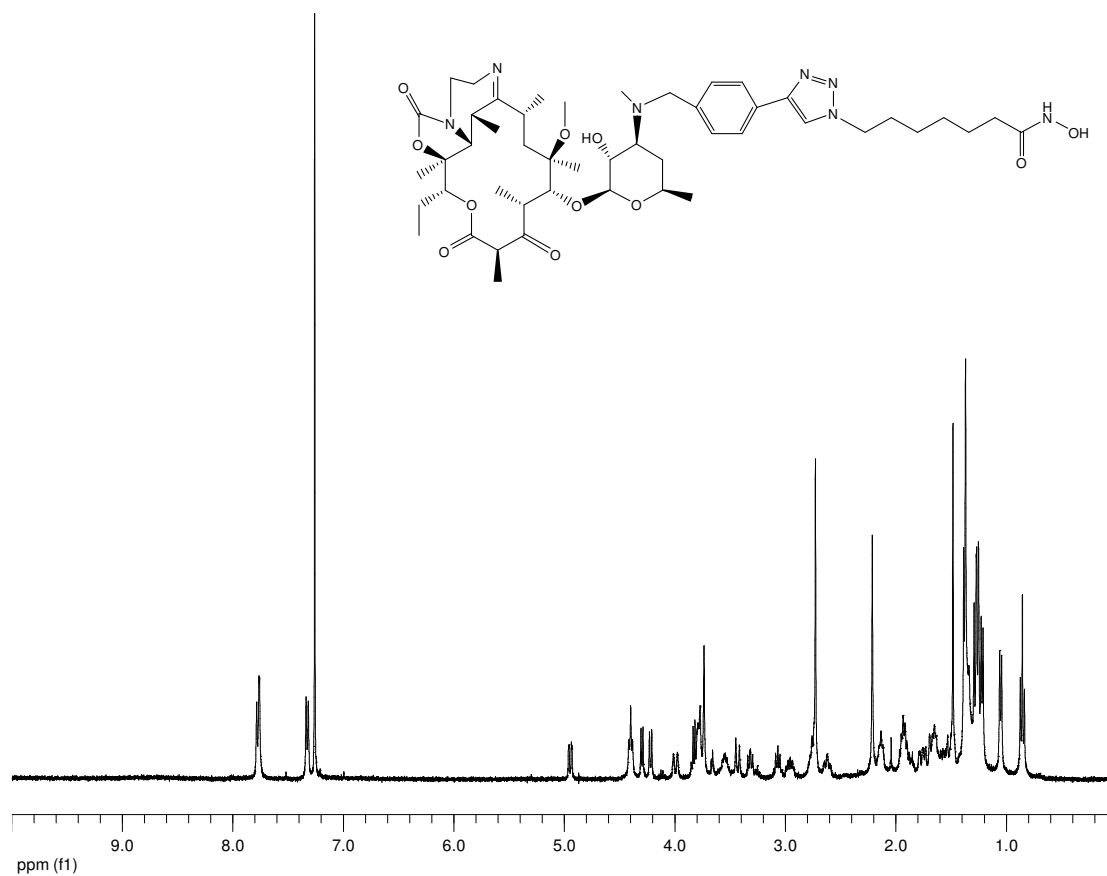

<sup>13</sup>C NMR of **15b**

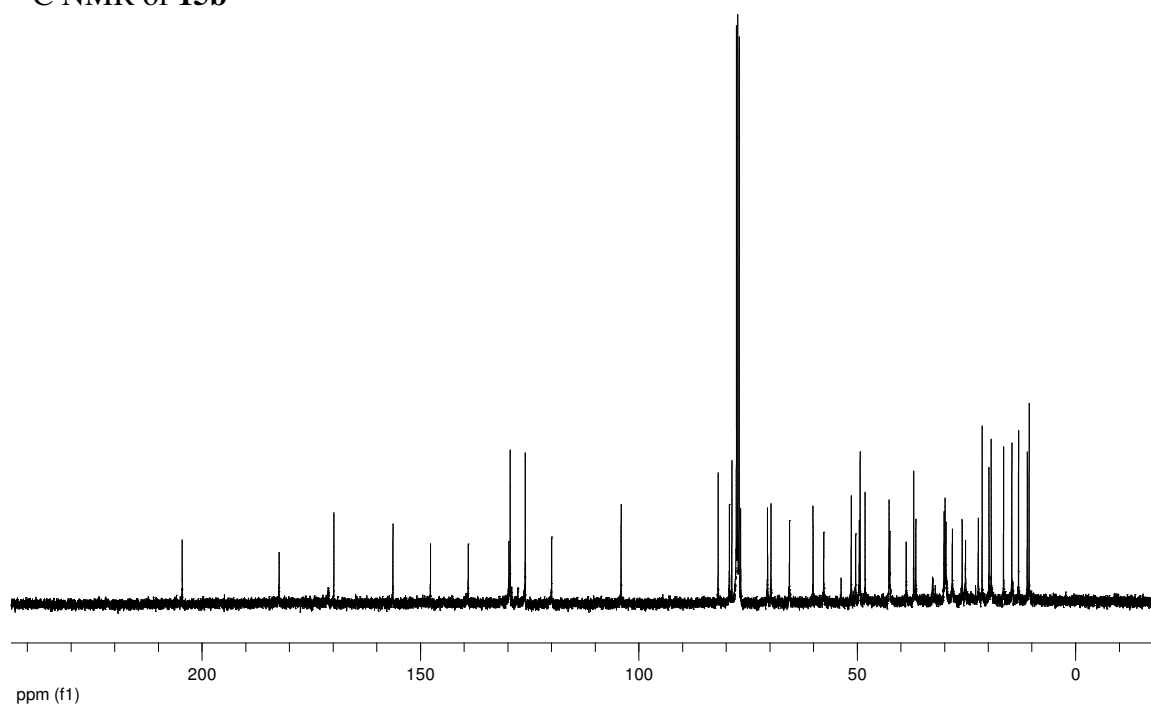

$^1\text{H}$  NMR of **15c**

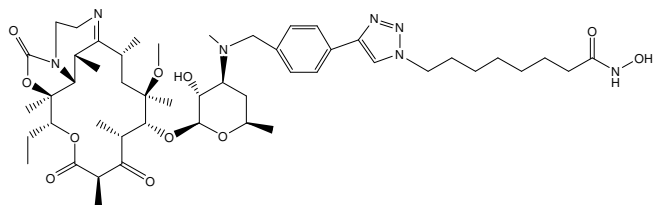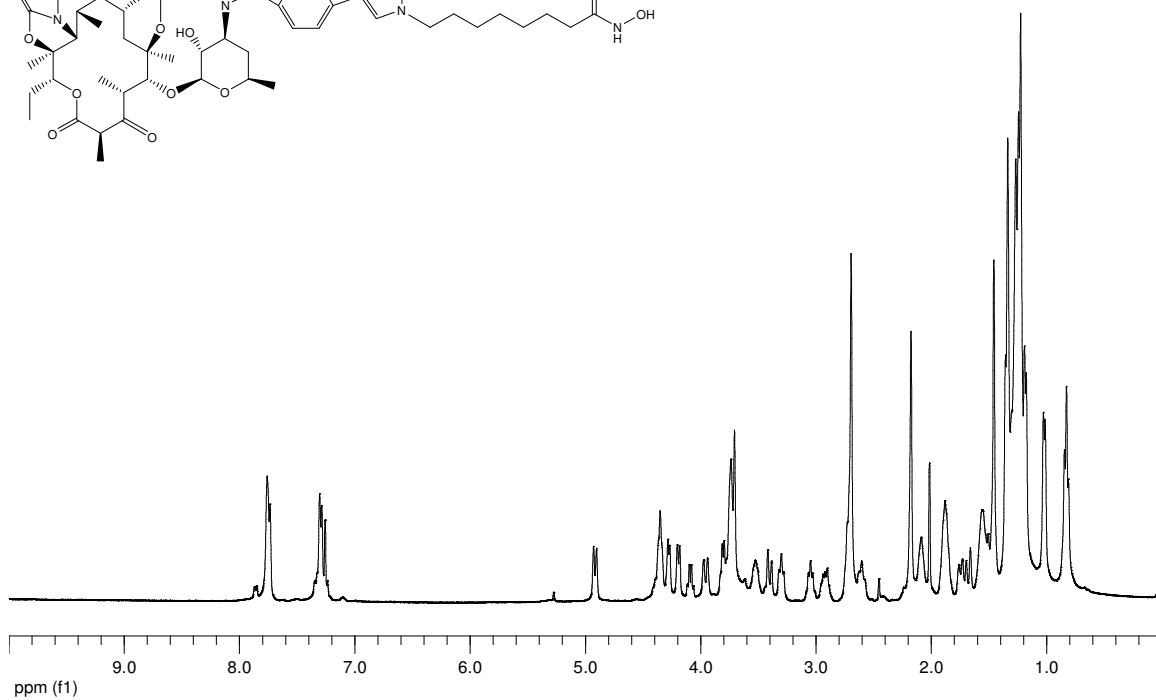

$^{13}\text{C}$  of **15c**

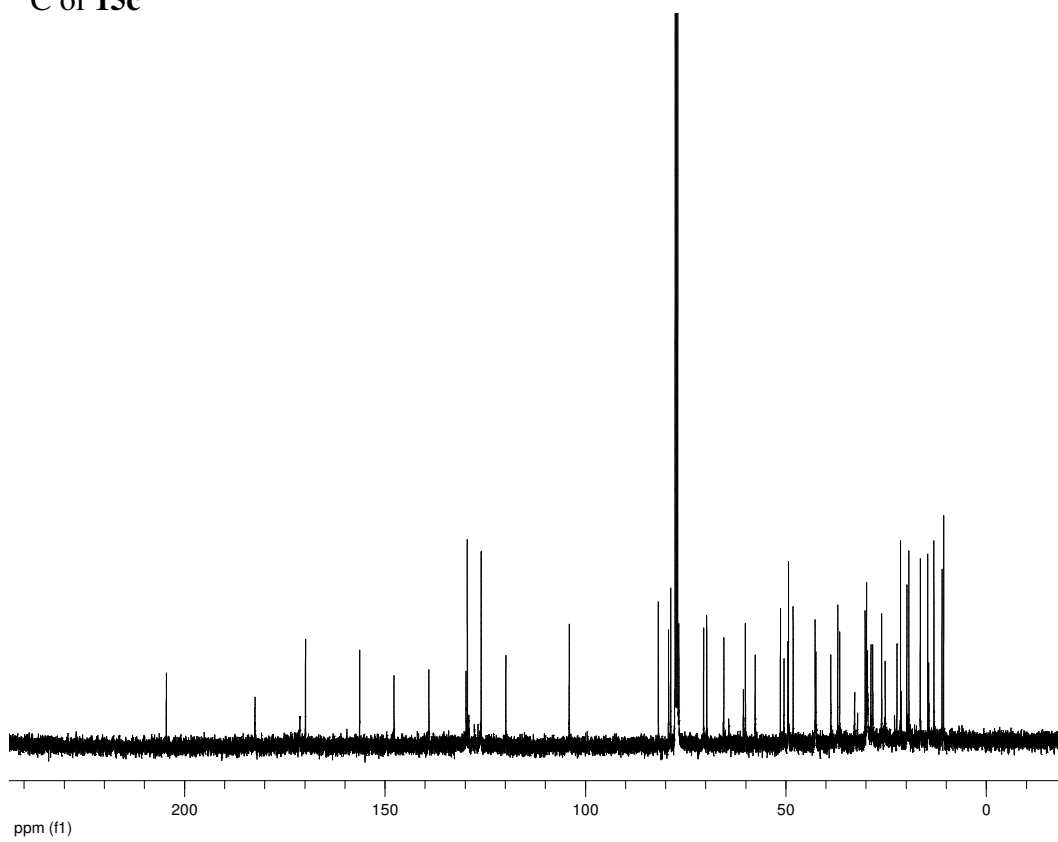



<sup>1</sup>H NMR of **15d**

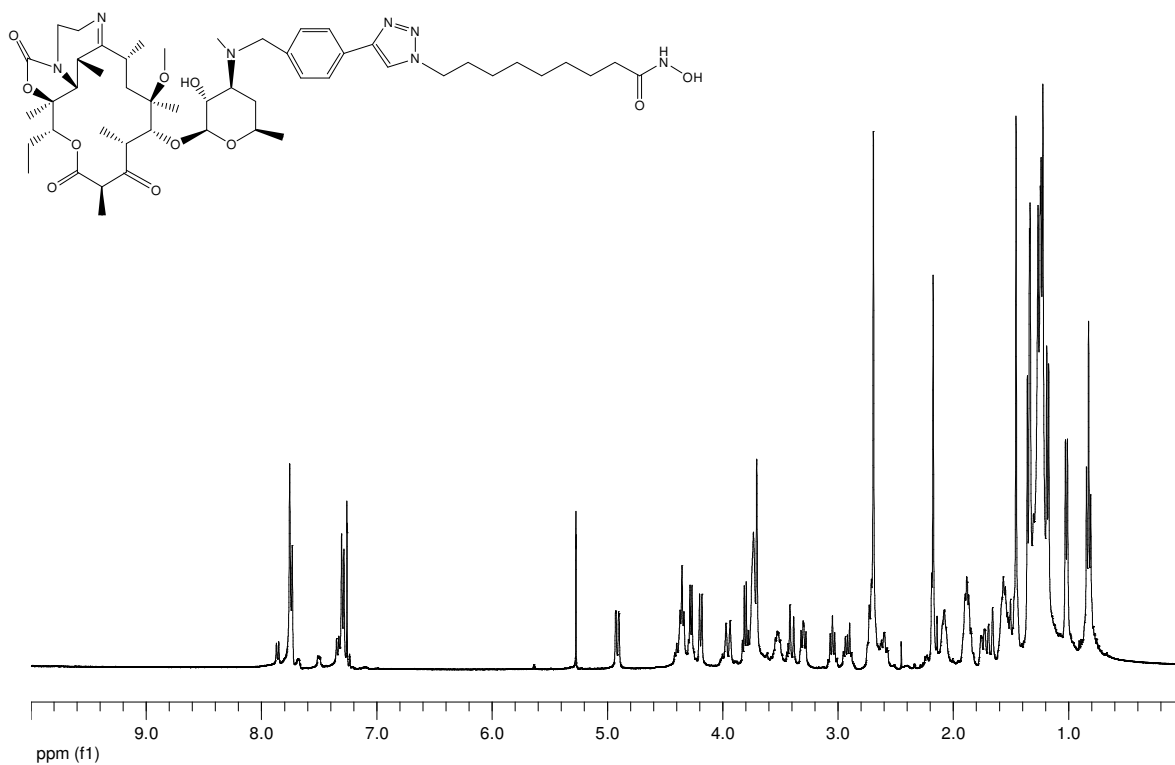

<sup>13</sup>C NMR of **15d**

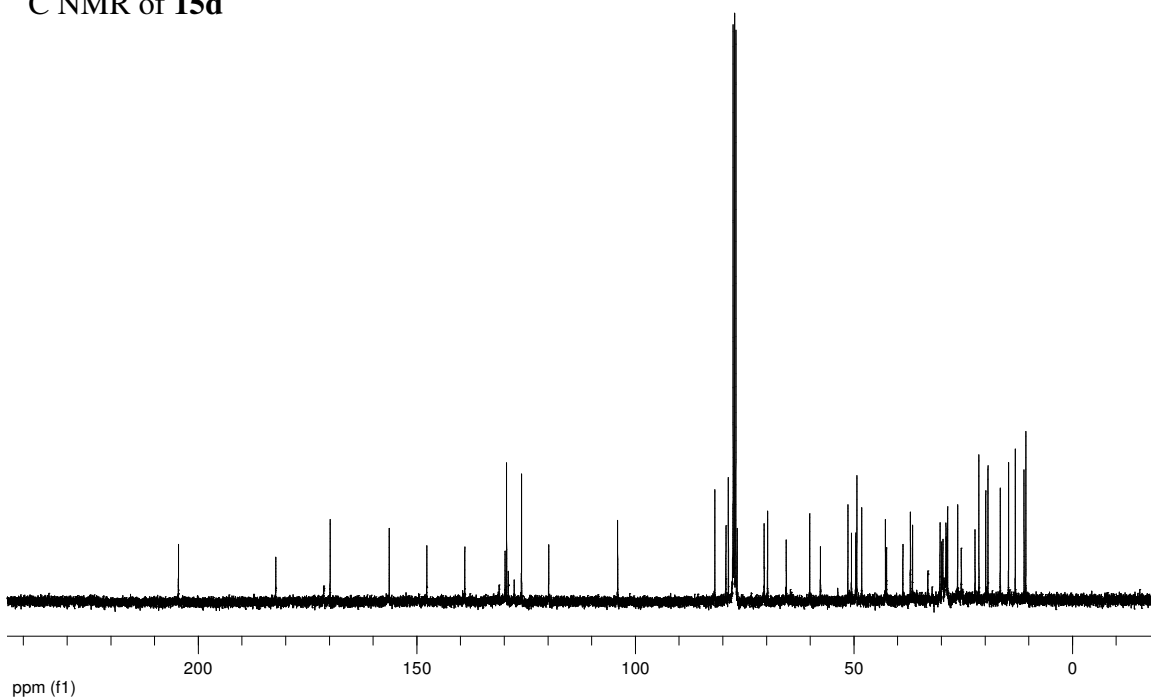

<sup>1</sup>H NMR of **15e**

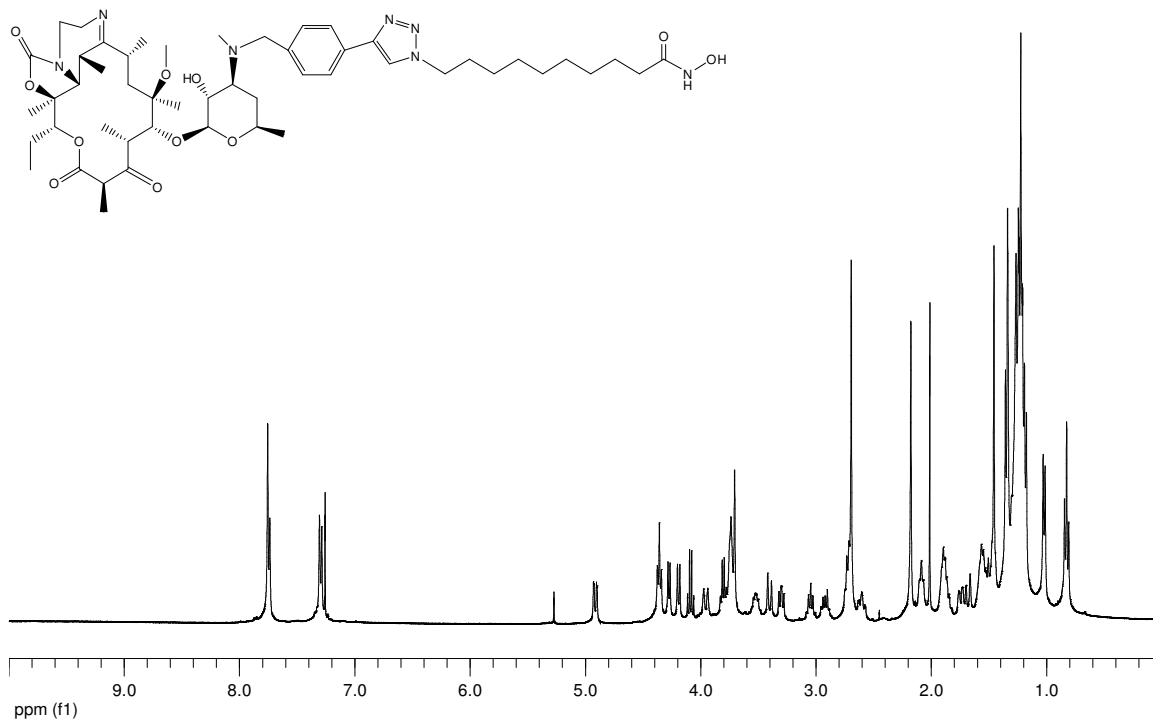

<sup>13</sup>C NMR of **15e**

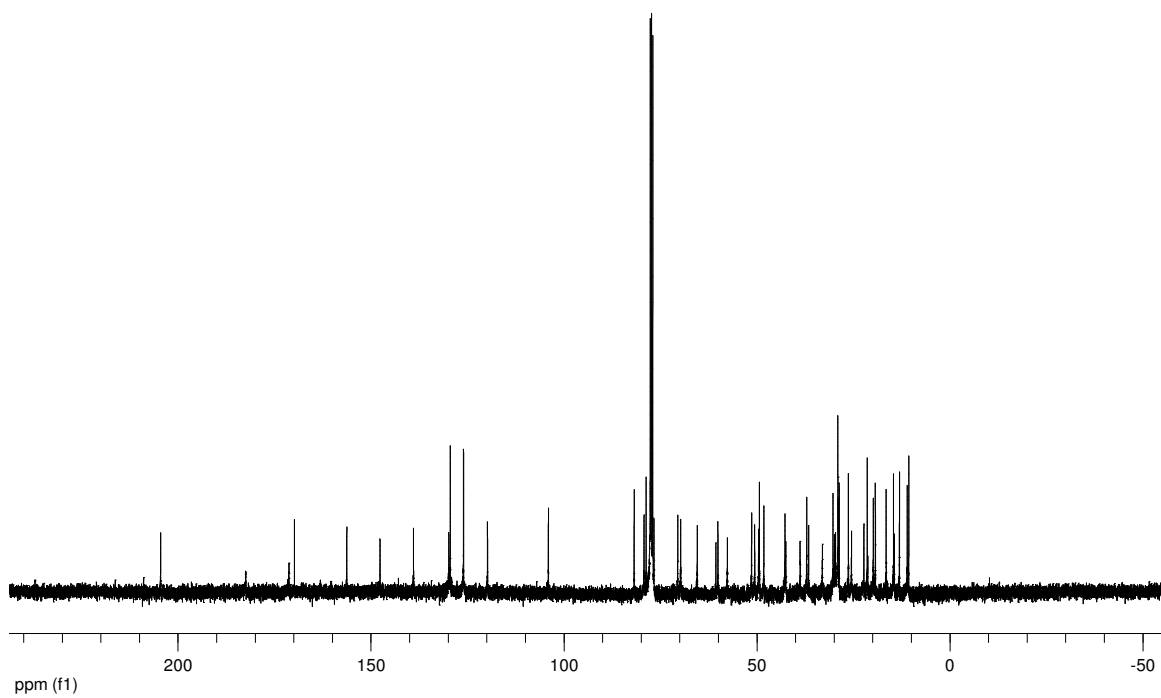

HPLC Trace of **15a**  
Retention Time: 20.167 min

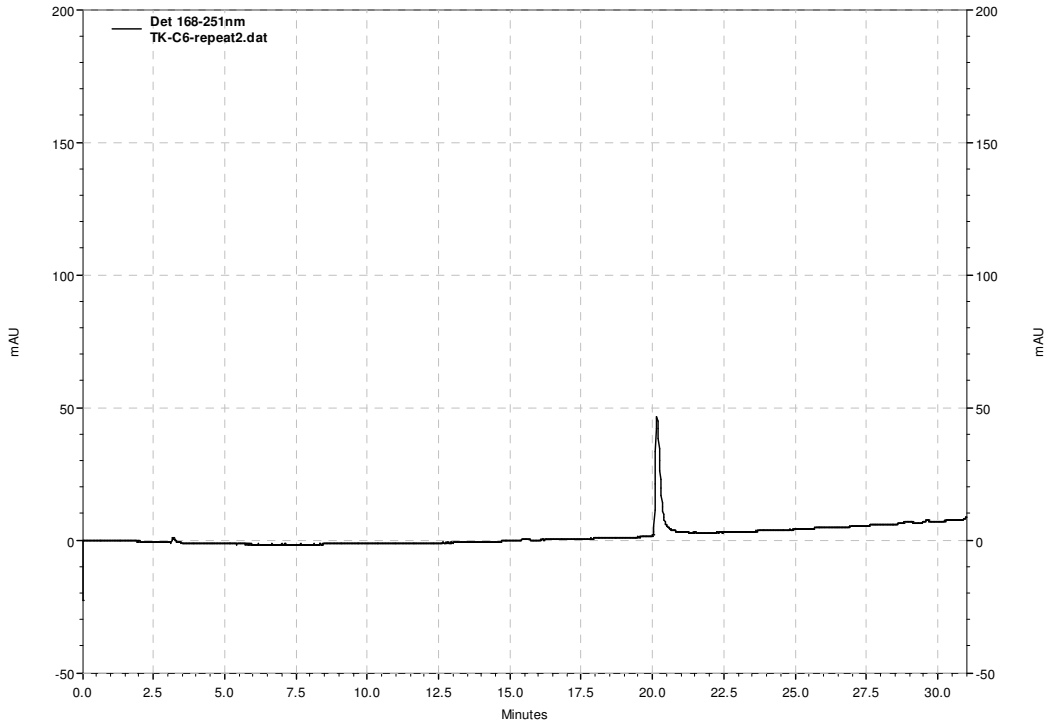

HPLC Trace of **15b**  
Retention Time: 21.233 min

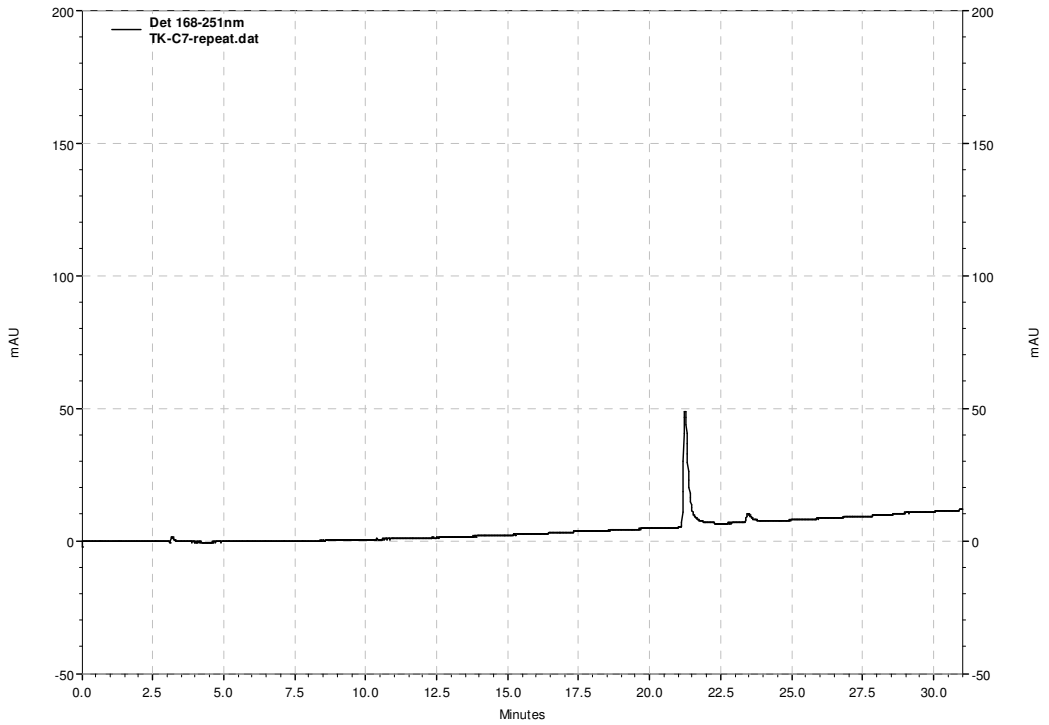

HPLC Trace of **15c**  
Retention Time: 22.533 min

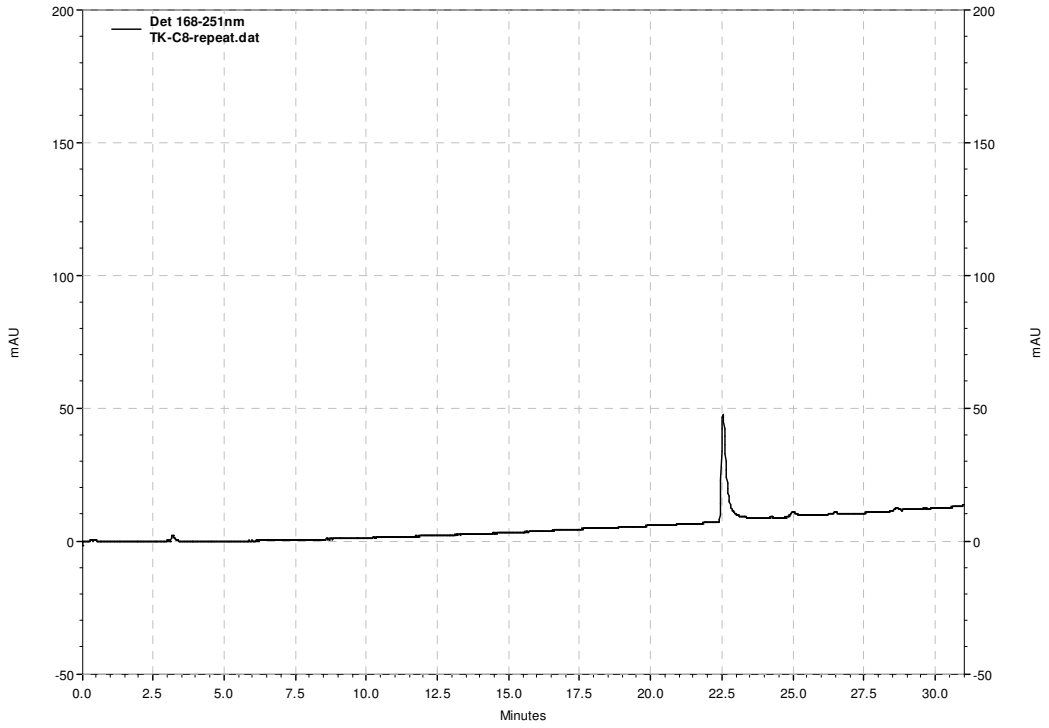

HPLC Trace of **15d**  
Retention Time: 23.983 min

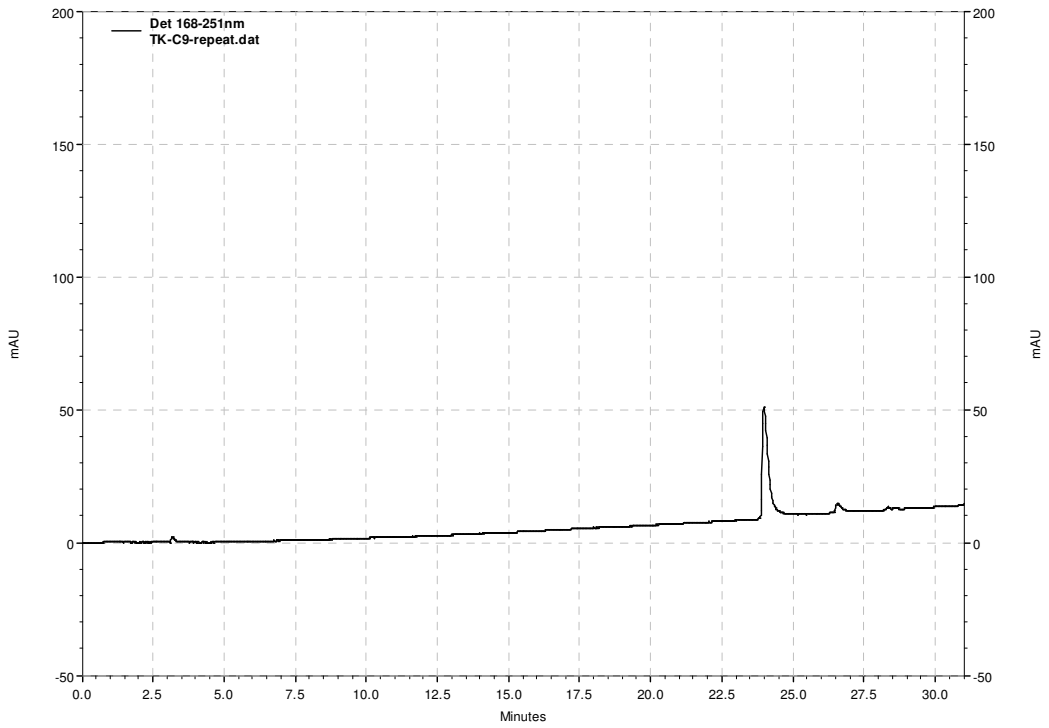

HPLC Trace of **15e**  
Retention Time: 25.583 min

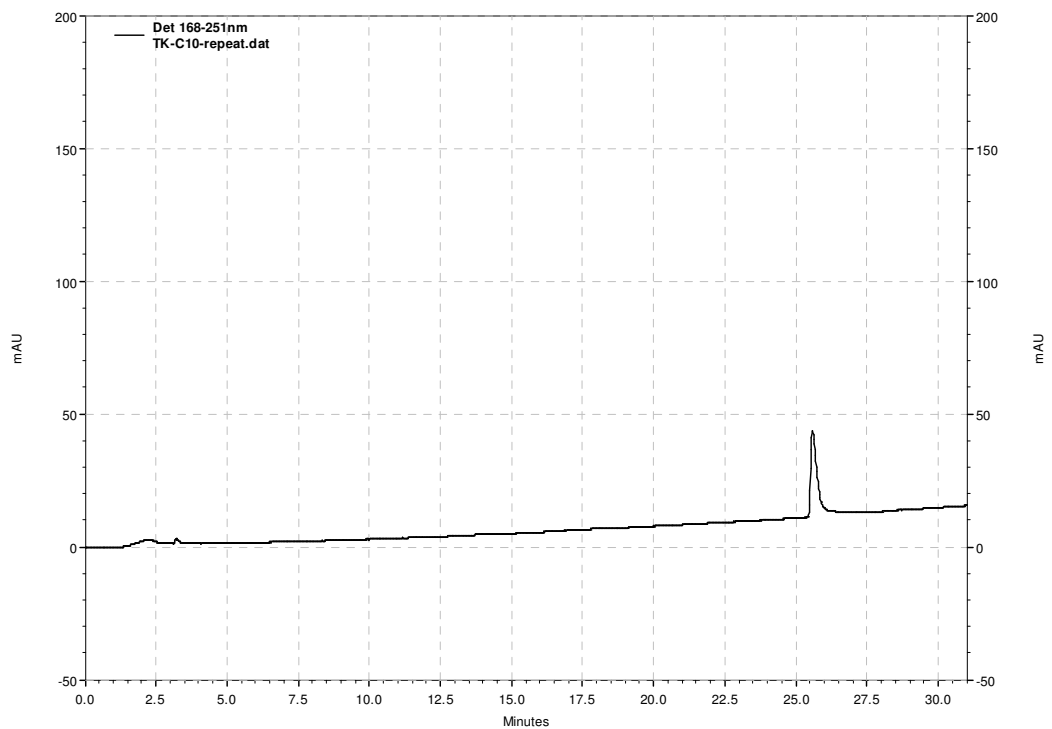

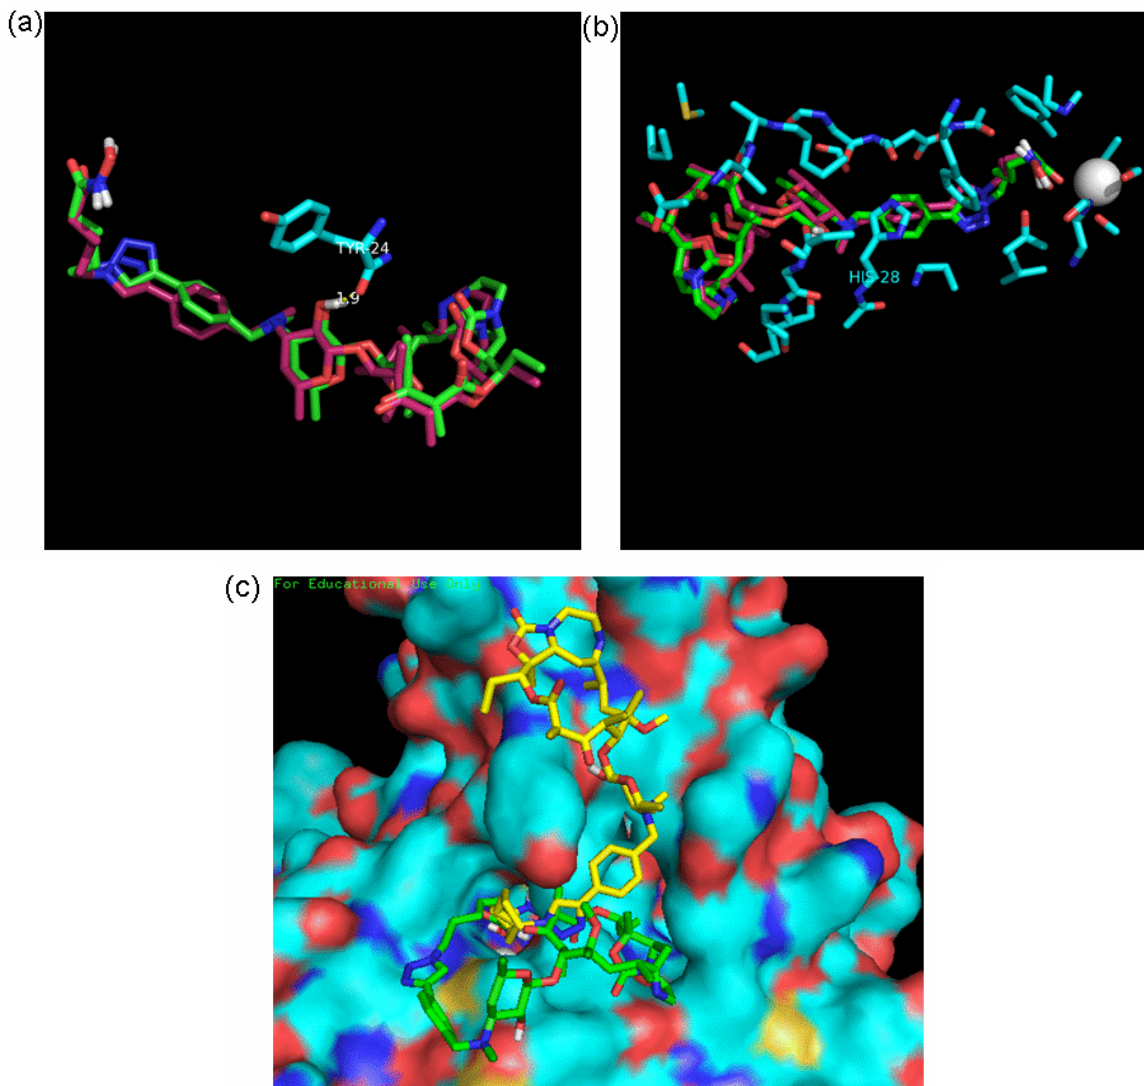

**Figure S1:** Docked structures of **15a-b** and **15e** at the outer rims of HDAC1 and HDAC8. **(a)** Compounds **15a** (pink) and **15b** (green) adopt docked orientations with their desosamine sugar 2'-OH group within 1.9 Å of the backbone carbonyl group of HDAC1 Tyr24 with which it could engage in a stabilizing H-bonding interaction. **(b)** A 5 Å cut of HDAC1 residues around **15a** (pink) and **15b** (green), note the placement of the His28 imidazole ring for a possible stacking interaction with the aryl moiety of **15b**. **(c)** Relative orientation of the macrocyclic rings of **15b** (green) and **15e** (yellow) within distinct hydrophobic pockets on HDAC8 outer rim.

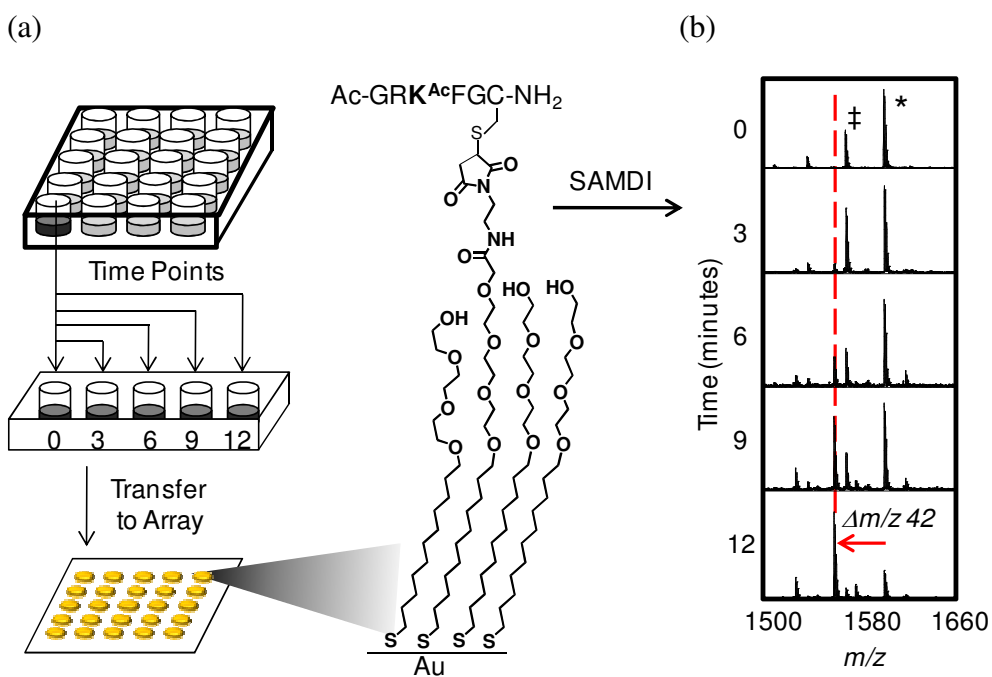

**Figure S2:** Schematic of the SAMDI Assay (Self-Assembled Monolayers for MALDI Mass Spectrometry). (a) Reactions were performed in a 96-well plate and reaction aliquots were removed at designated time points, terminated, and transferred to an array of gold circles presenting maleimide-terminated SAMs for substrate immobilization. (b) Representative SAMDI spectra after treatment with 250 nM **15b** where a shift of  $m/z$  42 signifies deacetylation. (\* indicates acetylated peptide; ‡ indicates a fragment from loss of sulfur; red line indicates deacetylated peptide)

**Pf-HDAC1 Activity Dose-response Curves:**

**Compound 15a**

**Pf-HDAC1 Activity**

Substrate Conc.=10 $\mu$ M of 50037

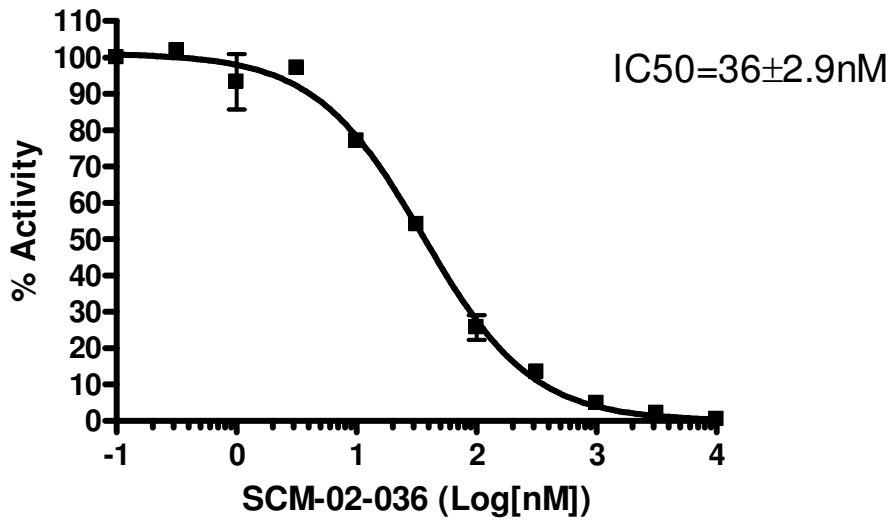

**Compound 15b**

**Pf-HDAC1 Activity**

Substrate Conc.=10 $\mu$ M of 50037

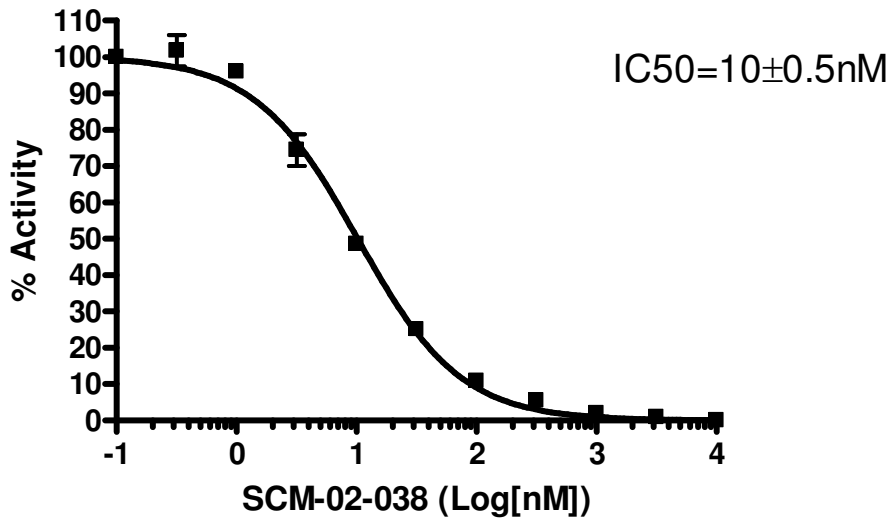



Compound 15c

**Pf-HDAC1 Activity**

Substrate Conc.=10 $\mu$ M of 50037

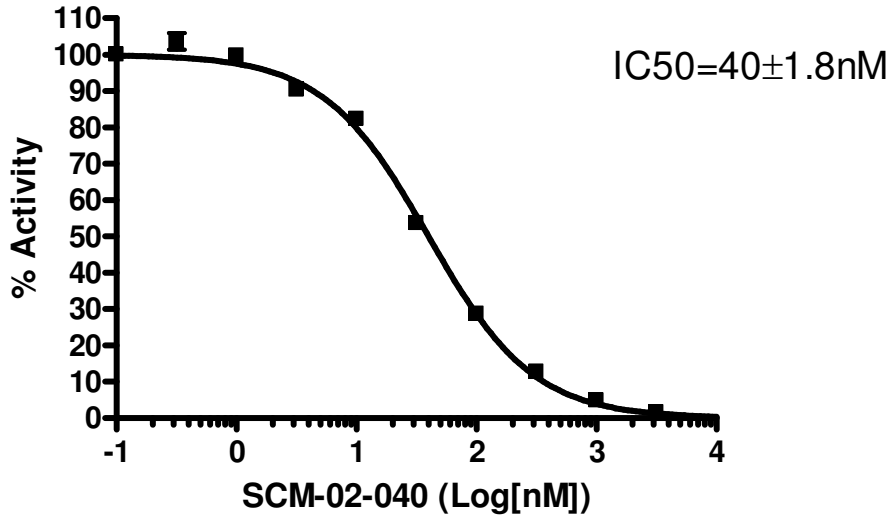

Compound 15d

**Pf-HDAC1 Activity**

Substrate Conc.=10 $\mu$ M of 50037

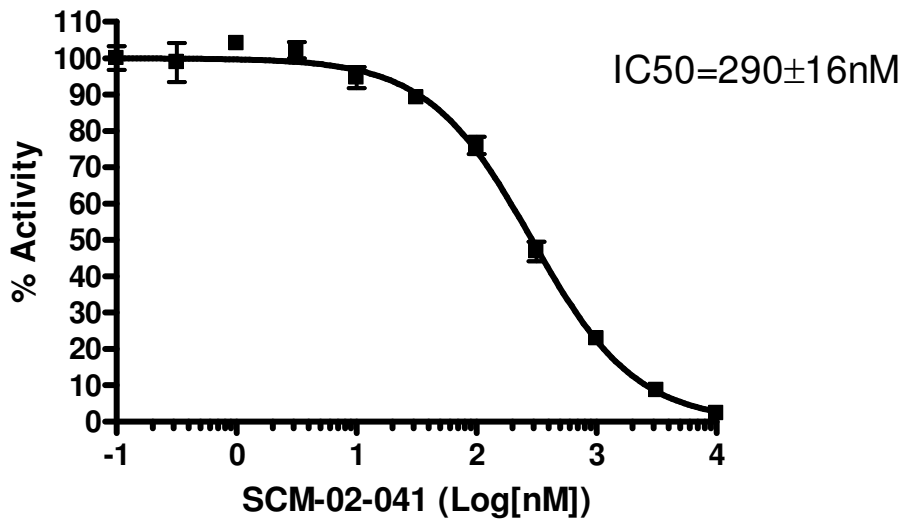

Compound 15e

**Pf-HDAC1 Activity**

Substrate Conc.=10 $\mu$ M of 50037

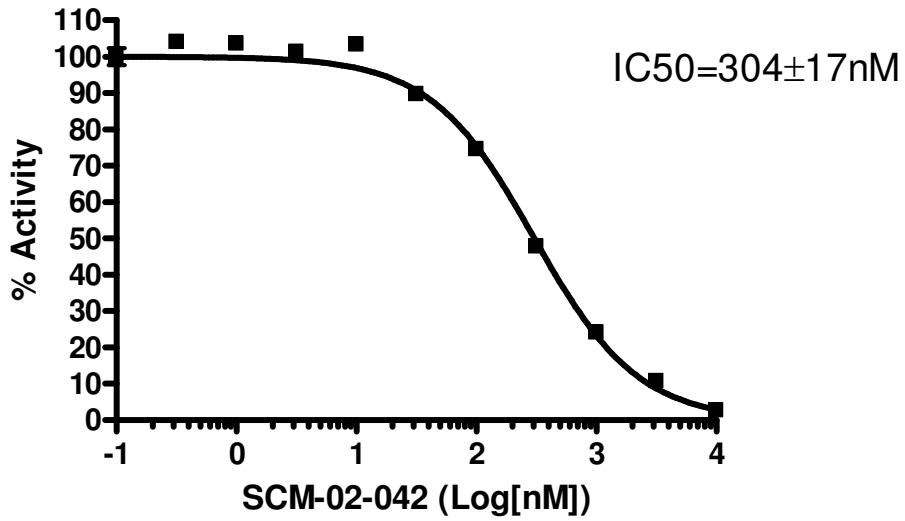

SAHA

**Pf-HDAC1 Activity**

Substrate Conc.=10 $\mu$ M of 50037

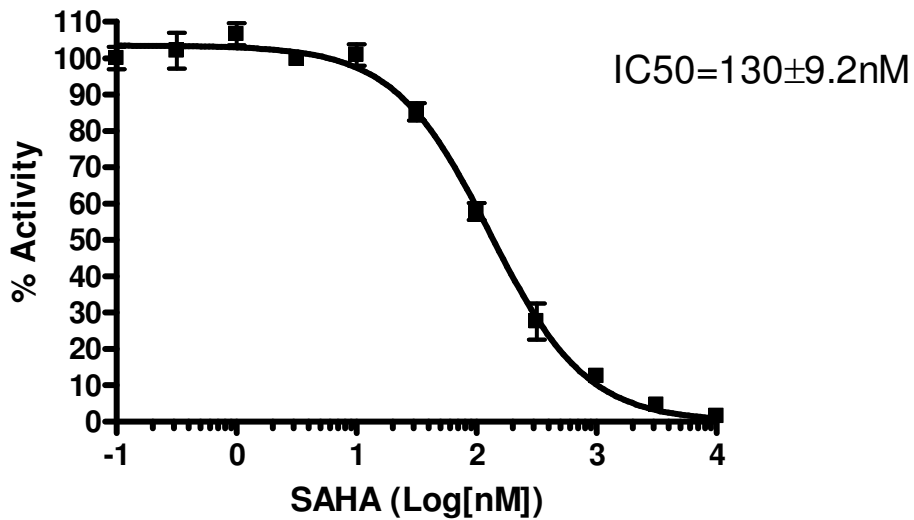

Supplement: NIHMS225940-supplement-1_si_001.pdf [file NIHMS225940-supplement-1_si_001.pdf]
